# Supplementary material for: The Usefulness of a Targeted Next Generation Sequencing Gene Panel in Providing Molecular Diagnosis to Patients With a Broad Spectrum of Neurodevelopmental Disorders
Source: Front Genet. 2022 Aug 11;13:875182. doi: 10.3389/fgene.2022.875182 (PMC9403311; doi:10.3389/fgene.2022.875182)
Supplement: Supplementary file 1 [file Table3.xlsx]

## Sheet: Denise
Supplementary Table 3 : Clinical characteristics of patients carrying P and LP variants
ID	Sex	Gene	Variant	Zygosity	rs	ClinVar Accession number	Clinical Caracteristics	EEG anomalies	Brain imaging alterations
9916	M	AKT3	NM_005465.7:c.503A>G p.Lys168Arg	Heterozygous	/	/	Psicomotor delay, head with plagiocephaly, mild prognathism with open mouth and macroglossia, modest muscular hypotonia CPR bilaterally, reaches with support the upright posture with an adequate pattern; walking with a slightly enlarged base.	none	MRI: finding of external hydrocephalus with widening of the liquor spaces along the bilateral front temporal convexity
8513	F	ANKRD11	NM_013275.6:c.2408_2412del p.Lys803ArgfsTer5	Heterozygous	rs886039902	VCV000266033.14	Psychomotor delay, phonologic language disorder with preserved communication, behavioral disorder Griffith scale DQ 74; behavioral disorder	none	n.a
10231	F	ANKRD11	NM_013275.6:c.1903_1907del p.Lys635GlnfsTer26	Heterozygous	rs886041125	VCV000279678.30	KGB syndrome,Idiopathic generalized epilepsy , mild intellectual disability, mild dysmorphism (macrodonthia, scoliosis, cardiac defects); myopia and astygmatism; hypoacusia; MRI: dysmorphic posterior cranial fossa, enlargement of the 4th ventricle and of the cisterna magna and hypoplastic and dysmorphic cerebellar vermis. EEG: diffuse anomalies.	diffuse anomalies	MRI: dysmorphic posterior cranial fossa, enlargement of the 4th ventricle and of the cisterna magna and hypoplastic and dysmorphic cerebellar vermis.
10462	M	ANKRD11	NM_013275:c.4384dupA p.Arg1462LysfsTer92	Heterozygous	rs886041521	VCV000280288.9	Focal epilepsy with secondary generalization; mild cognitive delay (WISC III:Q.I. verbale 51; Q.I. performance 62, total score: 51).	diffuse and focal paroxysmal anomalies	MRI: T2-FLAIR hyperintense alterations in the periventricular white matter and bilaterally around the fornix;
88-19	F	ARID1B	NM_017519.3:c.5003_5004insC p.Gln1668HisfsTer38	Heterozygous	/	/	Idiopathic focal epilepsy; oral dyspraxia; dysdiadochokinesia; motor impairment (hands and lower limbs).	bilateral fronto-central anomalies	n.a
212-20	M	ARID1B	NM_017519.3:c.4258_4259insC p.Gly1420AlafsTer109	Heterozygous	/		Psicomotor delay, Idiopathic focal epilepsy, dyspraxia.	Discreetly organized tracing, posterior paroxysmal abnormalities in sleep	none
482-19	M	ATP1A2	NM_000702.4:c.1091C>T p.Thr364Met	Heterozygous	rs1553244881	VCV000204884.11	Focal epilepsy; past episode of grand mal; chronic headache; fine and gross motility impairment.	paroxysmal anomalies in the right fronto-temporal region	n.a
78-20	F	ATP1A2	NM_000702.4:c.2750C>T p.Thr917Met	Heterozygous	rs747016236	/	Focal epilepsy; mild motor impairment; attention deficit and learning difficulties. Dismorphisms: coarse features of the face, bulbous nose, large mouth. Headache episodes associated with left elbow paraesthesia and walking weakness have been reported	Multifocal anomalies	none
514-21	F	ATP1A2	NM_000702.4:c.904del p.Val302SerfsTer25	Heterozygous	/	/	Psicomotor delay, feeding difficulty, microcephaly	n.a	MRI: Arnold - Chiari type I malformation
10727	M	CACNA1A	NM_000068.4: c.1067T>C p.Leu356Pro	Heterozygous	rs1568546568	VCV000593523.4	Global developmental disorder (IQ 80, VQ 74, MQ 61). Perinatal history: dystocic delivery, hypotonia, poor thriving, congenital scoliosis	EEG anomalies	none
927-19	F	CACNA1A	NM_000068.4:c.5005C>T p.Arg1669Ter	Heterozygous	rs1555738369	VCV000523785.5	Cryptogenic symptomatic focal epilepsy; intellectual disability; language delay, but good communication; global motor impairment.	some bilateral frontal spike anomalies.	n.a
8804	M	CACNA1A	NM_000068.4:c.3958G>A p.Asp1320Asn	Heterozygous	rs1568485068	VCV000585569.4	Drug-responsive generalized myoclonic epilepsy,strabism, mild intellectual disability; drug-responsive psychotic disorder (depressive and delusional symptoms with persecutional component and hearing dysperceptions)	presence of abnormal slow wave on bilateral frontal regions	none
928-19	F	CASK	NM_003688.3:c.252_255del p.Asp84GlufsTer20	Heterozygous	/	/	Drug-resistant epileptic encephalopathy; spastic tetraparesis; motor delay; absence of language	Poor organization, anomalies in the anterior regions.	MRI:aspecific ventricular dilation;
10635	F	CASK	NM_003688.3:c.1090A>G p.Ser364Gly	Heterozygous	rs759161435	VCV000872828.9	Motor disorder with mild inferior limb hypertonia; hypovision with strabismus; global developmental delay	n.a	n.a
10851	M	CDKL5	NM_003159.2:c.2798-1G>A	Hemizygous (X-linked)	/	/	Autism spectrum disorder; language delay (use of sign language); selective feeding; right eye convergence defects.	n.a	n.a
513-20	F	CDKL5	NM_003159.2:c.484G>T p.Glu162Ter	Heterozygous	/	/	Drug-resistant cryptogenic symptomatic focal epilepsy, severe intellectual disability, relational disorder,strabism	Slow theta anomalies, bilateral frontal spike-waves , predominantly on the left side	MRI: Right fronto-parietal irregular sulcal pattern, without obvious cortical malformations
8325	F	CHD7	NM_017780.4:c.5665+1G>C	Heterozygous	/	/	Mild intellectual delay (Leiter-R: total score 65, reasoning score 67); bilateral severe neurosensory hypoacusia (bilateral cochlear malformation and 8th cranial nerve agenesis) with consenquences on the verbal expression, verbal dyspraxia, dysmorphism (micrognathia, ogival palate and palatal schisis, suspected Crouzon syndrome); short stature (< 3rd centile) Past history: patent ductus arteriosu…	n.a	MRI: temporal cranial deformity, enlarged 4th ventricle; Brain CT: 4th ventricle ectasia, partial cerebellar vermis hypoplasia/agenesis, marked enlargement of peribulbar and prepontine cystern
10458	M	CREBBP	NM_004380.3:c.3835C>T p.Pro1279Ser	Heterozygous	rs267606752	VCV000009433.27	Rubinstein-Taybi syndrome; global developmental delay (WPSSI QI 20, VIQ 42, PIQ 45), severe global language disorder; psychomotor impairment (fine and gross motility); cryptoorchidism; microcephaly (CC <2nd centile); facial dysmorphism: bitemporal narrowing, depressed nasal bridge, prominent nasal tip, hypertelorism, low-set ears, arcuate eyebrows, microretrognathia, stereotyped smile, syalorrhea…	EEG: right parieto-occipital anomalies	n.a
948-19	M	CTNNB1	NM_001904.4:c.936_936+1insTG p.Leu313CysfsTer13	Heterozygous	/	/	Psychomotor delay; cerebral palsy with predominant involvement of the lower limbs. lower limb hypertonia; peculiar facies: thin labial rim, flat philtrum, prominent forehead, flat sutures. Perinatal history: biamniotic twin pregnancy, assisted fertilization, small for gestational age, neonatal desaturation.	n.a	MRI: microcephaly. Brain US: mild bilateral hyperchogenic areas.
8511	M	CTNND2	NM_001332.4: c.313C>T p.Gln105Ter	Heterozygous	/	/	Mixed behavioral and emotional disorder; mixed learning disorder; no intellectual disability (WPPSI-III QI 96);telangectasias	none	MRI: ischemic signs in the cerebellar cortex, mild subcortical white, matter hyperintensity, initial superficial cortical atrophy, thinning of posterior corpus callosum, mild hyperplasia of right posterior thalamus and of right cerebellar tonsil,
9481	F	DDX3X	NM_001356.5:c.1171-1G>T	Heterozygous	/	/	Global developmental delay; mild diffuse hypotonia and ligamentous laxity;	Diffuse high-voltage slow-waves and spikes in the bilateral frontal regions mostly across the falling asleep period	MRI: reduced myelination with posterior white matter hyperintensity, thinning of corpus callosum
8836	M	DHCR7	NM_001360.3:c.964-1G>C	Compound heterozygous	rs138659167	VCV000093725.51	Motor delay with lower limb hypertonia; convergent strabismus; right plagiocephaly and microcephaly (cranial circumference < 3rd centile); truncal hypotonia; mild developmental delay (Griffith scale DQ 62); Fetal history: vaginal swab positive for GBS with prophylaxis	Mild interhemispheric asymmetry	MRI:Mild enlargement of cisterna magna
			NM_001360.3:c.523G>A p.Asp175Asn	Compound heterozygous	rs368269558	VCV000550600.1
765-20	M	EHMT1	NM_024757.5:c.3398C>G p.Thr1133Arg	Heterozygous	/	/	Intellectual disability, psicomotor delay	n.a	n.a
345-19	F	FOXG1	NM_005249.5:c.694A>G p.Asn232Asp	Heterozygous	rs786205486	VCV000538816.1	Mild intellectual disability/psychomotor delay; past focal seizures; behavioral disorder; microcephaly ; dystonia and ataxia; phonologic language disorder; Griffith scale DQ 74 (hearing-language score in the area of delay)	n.a	n.a
213-20	M	FOXP1	NM_032682.6:c.570-1G>C	Heterozygous	rs1576175491	VCV000801985.1	Developmental delay; hyperactivity; cryptogenic symptomatic epilepsy.	EEG: some spike anomalies in the fronto-centro-parietal regions, mainly on the left, but with a tendency to diffuse.	none
749-20	F	FOXP1	NM_032682.6:c.1240dup p.Leu414ProfsTer47	Heterozygous	rs797044652	VCV000194567.6	Psychomotor delay; intellectual disability (WISC-III global IQ 31, VIQ 41, PIQ 35); inhibition; anxiety; poor interaction with the surrounding environment; neurologic bladder; camptocormic gait; myopia with nystagmus, strabismus; positive Babinski sign and bilateral clonus of the Achilles tendon; overweight; high palate; motor deficit of the right upper and lower limbs. Past history: surgical rem…	n.a	MRI:Arnold-Chiari malformation, new lumbo-sacral cysts and spinal chord calcifications (suspected cystic angiomatosis/lymphatic anomalies)
574-19	F	FOXP1	NM_032682.6:c.777_780del p.Lys259AsnfsTer6	Heterozygous	/	/	Autism spectrum disorder, strabism, mild develpmental delay, epilepsy. Aggressive behaviour. Short stature and relative macrocephaly	Diffuse anomalies	none
684-19	F	GABRA1	NM_000806.5:c.641G>A p.Arg214His	Heterozygous	rs886039373	VCV000265162.16	Febrile and afebrile seizures. Mild gross and fine motility impairment.	n.a	n.a
9226	F	GATAD2B	NM_020699.4:c.332G>A p.Arg111Gln	Heterozygous	rs1300040082	/	Mild cognitive delay (WISC II IQ 59); emotional disorder; behavioral disorder; mild fine motility impairment; learning difficulties	none	none
490-19	F	GDI1	NM_001493.3:c.1036C>T p.Gln346Ter	Heterozygous	/	/	Intellectual disability WISC-R: total score 50 (performance 49; verbal 59); motor impairment; oro-bucco-facial dyspraxia;	Posterior paroxysmal anomalies.	n.a
2-20	M	GNAS	NM_080425.3:c.303_304insT p.Met102TyrfsTer6	Heterozygous	/	/	Attention deficit/hyperactivity disorder; borderline cognitive disorder; aspecific learning disorder.	n.a	n.a
446-20	F	GNAS	NM_080425.3:c.214G>A p.Gly716Ser	Heterozygous	/	/	First steps towards 13 months. First words within the year and subsequent arrest of language development. Cognitive evaluation: IQ 74 with a borderline cognitive picture. The evaluation with ados scale confirmed the diagnosis of autism spectrum disorder	none	none
796-19	F	GNAS	NM_080425.3:c.2936G>A p.Arg979Gln	Heterozygous	/	VCV001321633.1	Mild psychomotor retardation, macrocrania, obesity, genitourinary anomalies, astigmatism and farsightedness corrected with lenses, small hands with tapered fingers, slight brachydactyly of the 5th finger	Epileptiform anomalies	none
328-19	M	GRIN2B	NM_000834.4: c.1385T>C p.Ile462Thr	Heterozygous	/	/	Severe cognitive delay (IQ 30); past epileptic encephalopathy	Paroxysmal anomalies in the right emisphere and left parieto-occipital regions.	n.a
422-20	F	GRIN2B	NM_000834.5:c.286G>A p.Gly96Arg	Heterozygous	/	/	Mild cognitive delay; language delay; motor and coordination impairment. Perinatal history: birth at 32 weeks of gestation; incubator for one week.	Slowed activity in the posterior regions.	n.a
947-19	M	KANSL1	NM_001193466.2:c.1653-2A>G	Heterozygous	/	/	Hypotonia, recurrent respiratory infections.	n.a	n.a
275-19	M	KANSL1	NM_001193466.2:c.2021A>G p.Asp674Gly	Heterozygous	/	/	Autism spectrum disorder; developmental delay (especially in language); attention deficits; relational difficulties; hyperactivity; Perinatal history: maternal hypertension. Family history: paternal aunt with language delay	none	n.a
8579	M	KCNQ2	NM_172107.4:c.1090G>C p.Glu364Gln	Heterozygous	/	/	Cryptogenic focal epilepsy with tonic-clonic crises during sleep; mild-moderate intellectual disability	Slow anomalies in the left fronto-temporal region.	n.a
525-21	M	KCNQ2	NM_172107.4:c.641G>A p.Arg214Gln	Heterozygous	rs1057518555	VCV000578032.3	Benign partial epilepsy (suspected Fukuyama-Watanabe–Vigevano syndrome: clustered epileptic crises, normal psychomotor development, normal EEG)	n.a	n.a
10617	M	KDM5B	NM_006618.5:c.3133C>T p.Arg1045Ter	Heterozygous	rs754431955	/	Psychomotor delay; Griffith scale DQ 44; dysmorphism (triangular face, frontal bossing, facial angiomas, bilateral toes clynodactyly, rocker bottom feet)	none	MRI: enlargement of frontal liquoral spaces, mild thinning of corpus callosum. Bilateral subependymal heterotopia. Mild frontal cortical asymmetry. Megacisterna magna
1002-19	M	KDM6A	NM_021140.3:c.1952C>A p.Ser651Ter	Hemizygous (X-linked)	/	/	Syndromic intellectual disability; panic attacks.	n.a	n.a
32-19	F	MECP2	NM_004992.4:c.397C>T p.Arg133Cys	Heterozygous	rs28934904	VCV000011809.40	Focal epilepsy; intellectual disability (WPPSI-III total IQ 51, VIQ 55, PIQ 53, general language 76);	centro-temporal, predominantly left anomalies	Non-specific bilateral periventricular hyperintense areas in the corona radiata
257-19	F	MED13L	NM_015335.4:c.4963delG p.Glu1655LysfsTer5	Heterozygous	/	/	Psychomotor delay; dysmorphic features (frontal bossing, depressed nasal bridge, hypoplastic ears, tongue protrusion, sialorrhea); hypotonia with preservation of nerve reflexes; broad-based gait with varus knee; abnormal tactile perception; gastrectasia and enlarged liver and spleen	n.a.	MRI: reduced brain parenchyma, ventricular dilation
7790	F	NAA10	NM_003491.4:c.384T>A p.Phe128Leu	Heterozygous	rs878853263	VCV000236258.3	Severe intellectual disability; complete absence of speech; facial dysmorphism; focal seizure and tremors	EEG poorly organized	MRI: microcephaly with compensatory hyperpneumatization of paranasal and mastoid sinuses, mild diffuse enlargement of subarachnoidal spaces and ventricles
254-19	F	NALCN	NM_052867.4:c.2294G>C p.Arg765Thr	Heterozygous	/	/	Generalized absence seizures with myoclonic crises and photosensitivity;	Diffuse and focal left frontotemporal anomalies	MRI: minimal enlargement of left posterior hyppocampus Family history remotely positive for epilepsy
139-20	F	NEXMIF	NM_001008537.3:c.2552C>A p.Ser851Ter	Heterozygous	/	/	Drug resistant epileptic encephalopathy with tonic/myoclonic seizures; intellectual disability; psychosis.	Irregular low-amplitude background activity with some faster low amplitude rythms. Eyes-closure induced fast spikes and sharps in the bilateral fronto-central regions	n.a.
9322	M	NLGN1	NM_014932.5:c.1156G>T p.Gly386Ter	Heterozygous	/	/	Mild intellectual disability, attention deficit; motor impairment; oral dyspraxia; prematurity; dysmorphism: bifid uvula and ogival palate; little autonomy	none	Cranial US: mild enlargement of lateral ventricles
494-19	F	PAK3	NM_001128168.3: c.500C>G p.Thr167Arg	Heterozygous	/	/	Drug-resistant focal epilepsy.	n.a	n.a
781-20	F	PHIP	NM_017934.7:c.1096G>T p.Asp366Tyr	Heterozygous	/	/	Behavioral disorder: impulsivity, hyperactivity, attention deficit, cognitive difficulties, difficulties in motor inhibition, aggressiveness, oppositional-provocative behavior, anxiety, sadness, learning difficulties. Mild upper limb hyperlaxity, left flank lipoma, some nevi, accentuation of cervical kyphosis. Perinatal history: delayed closure of the central fontanelle. Frontal bossing (surgical…	n.a	none
85-19	F	PRRT2	NM_145239.3:c.649dupC p.Arg217ProfsTer8	Heterozygous	rs772994486	VCV000065758.57	Familial infantile epilepsy	multifocal anomalies in the left temporal front	none
9574	M	RAI1	NM_030665.4:c.2000T>C p.Leu667Pr	Heterozygous	rs761774471	/	Growth and psychomotor delay; dysmorphic features	n.a	n.a
10488	F	SCN1A	NM_001165963:c.2266A>T p.Lys756Ter	Heterozygous	rs1426666349	VCV000847338.2	At birth perinatal suffering due to the need for Kristeller's maneuver and funiculus loop in the neck; normal perinatal period. Adequate development on the motor level, delay in expressive language with adequate understanding skills; tendentially hyperkinetic behavior with difficulty paying attention. From the age of 3 months onset of febrile and afebrile crises of the clonic tonic type, of short…	Rare right parieto-occipital anomalies.	none
10457	F	SCN1A	NM_001165963:c.695-6_695-3del	Heterozygous	/	/	Severe infantile myoclonic epilepsy, language disorder with dyspraxia (first word at the age of 3); borderline cognitive function; mildly altered visuo-constructive, problem-solving and logic abilities; limited short-term and long-term memory; episodes of depression; mild intellectual disability (WISC III IQ 59, VIQ 44, PIQ 85); Perinatal history: neonatal suffering with amniotic fluid ingestion,…	n.a	n.a
11-19	F	SCN1A	NM_001165963:c.4793A>T p.Tyr1598Phe	Heterozygous	rs377325221	VCV000206850.10	Communication and relational disorder.	none	n.a
88-20	F	SCN1A	NM_001165963:c.5104G>T p.Asp1702Tyr	Heterozygous	rs748333147	VCV000206857.2	Autism spectrum disorder; language disorder. Perinatal history: Caesarean section at 38 weeks of gestation due to podalic presentation.	none	n.a.
10463	F	SCN8A	NM_014191: c.4594A>T p.Ile1532Phe	Heterozygous	rs1555229496	VCV000802859.1	Epileptic encephalopathy; spastic tetraparesis; severe intellectual disability; absence of language and movement; impaired daily functioning.	n.a	n.a
81-19	M	SETD1B	NM_001353345.2:c.5291_5292insA p.Asn1765GlnfsTer9	Heterozygous	/	/	Idiopathic generalized absence seizures; mild intellectual disability WISC IV IQ 53; behavioral disorder (childhood psychosis)	Rare bilateral anterior anomalies	MRI: mild thinning of corpus callosum; minimal enlargement of lateral ventricles; right parietal arachnoid cyst.
9137	M	SHANK2	NM_133266.5:c.769C>T p.Arg257Ter	Heterozygous	/	VCV000978856.1	Global developmental delay, expressive language disorder, mild intellectual disability; two small cafè au lait spots; mild motor impairment (especially fine motility).	none	none
9320	F	SLC2A1	NM_006516:c.388G>A p.Gly130Ser	Heterozygous	rs80359819	VCV000627587.2	Generalized seizures	abnormal	n.a
483-19	M	SLC2A1	NM_006516:c.988C>T p.Arg330Ter	Heterozygous	rs80359826	VCV000207196.18	Mild global developmental delay affecting mainly expressive language; dysmorphic features (hypotelorism, long philtrum); some episodes of loss of consciousness (affective spasm?) with rigidity	n.a	n.a
8697	M	SLC2A1	NM_006516.4:c.85_89del p.Asn29TrpfsTer58	Heterozygous	/	/	Mioclonic epilepsy, mild right occipital asimmetry, axial hypotonia, poorly armonized movements	none	none
10360	F	SLC2A1	NM_006516:c.967G>A p.Val323Met	Heterozygous	rs749426767	VCV000379117.6	Drug-resistant focal cryptogenic epilepsy.	bilateral centro-parietal anomalies.	n.a
12-21	F	SLC2A1	NM_006516.4:c.109C>T p.Gln37Ter	Heterozygous	/	/	Ataxic-spastic syndrome; epilepsy	n.a	MRI: minimal enlargement of lateral ventricles.
1-19	F	SLC9A6	NM_001042537.1:c.264C>G p.Ile88Met	Heterozygous	/	/	Autism-spectrum disorder; ADOS-2 score 18 (cut-off =/>14); mild clinodactily; Vineland-II scale: global score 56, communication 42, socialization 64; daily abilities 70, motor abilities 82	none	none
84-19	F	SMARCC2	NM_003075.5:c.2984dupC p.Ala996CysfsTer16	Heterozygous	/	/	Myoclonic-astatic seizures; moderate cognitive delay (Griffiths Mental Development Scales GQ = 46); attention deficit; stuttering	n.a	n.a
896-19	F	SYNGAP1	NM_006772.3:c.509G>A p.Arg170Gln	Heterozygous	rs1057519546	VCV000375528.4	Autism spectrum disorder; seizure episodes overlapping with behavioral disorder.	some anomalies in the anterior and posterior regions.	n.a
559-19	M	TPO	NM_000547.5:c.1472G>A p.Arg491His	Homozygous	rs201165648	VCV000252491.1	Cognitive and language delay, congenital hypothyroidism, obesity, hyperphagia, irritability.	n.a	n.a
298-19	M	TBX1	NM_080646.1:c.1010-2A>G	Heterozygous	/	/	Severe intellectual disability and developmental delay (Brunet-Lézine DQ = 48), predominantly in the performance, visuo-perceptive coordination, and communication; disequilibrium; behavioral disorder	Paroxysmal anomalies in the occipital area	MRI: thinning of corpus callosum and reduced white matter signal
		UBE3A	NM_000462.5:c.2576_2579del p.Lys859ArgfsTer4	Heterozygous	rs587784527	VCV000160220.28
10456	M	VPS13B	NM_017890.4:c.9406-1G>T	Compound heterozygous	rs386834119	VCV000056699.8	Cohen syndrome: microcephaly, peculiar facies, hypotonia, nonprogressive cognitive deficit, myopia, retinal dystrophy, neutropenia, truncal obesity	n.a	n.a
			del ex4-7	Compound heterozygous	/	/
211-20	M	ZMYM2	NM_197968.4:c.1765C>T p.Arg589Ter	Heterozygous	rs1952668177	VCV000982430.1	Language delay; fine and gross motility impairment; isolation and relational difficulties; attention deficits, distractability and short memory deficits; hyperactivity; perseveration; specific phobias; organizational and emotional difficulties; intellectual disability (WPPSI-III IQ 71, VQ 58, PQ 89); myopia and hyperopia. Perinatal history: poor fetal growth, placental disruption, neonatal icteru…	none	MRI: thickening of left frontal cortex
8634	F	ZMYM2	NM_197968.4:c.474dup (p.Ser159GlnfsTer6)	Heterozygous	/	/	Mild intellectual disability, language delay	n.a	n.a
n.a : not available as the EEG and/or MRI was either not performed or was not present in the patient's documentation avaible at the time of manuscript writing
