# Supplementary material for: The Usefulness of a Targeted Next Generation Sequencing Gene Panel in Providing Molecular Diagnosis to Patients With a Broad Spectrum of Neurodevelopmental Disorders
Source: PubMed Central journal article supplement (PMC9403311; doi:10.3389/fgene.2022.875182), 2022-08-11
Supplement: Table1.pdf [file Table1.pdf]

**Supplementary Table S1. List of the 221 genes included in the NGS panel.**

| GENE NAME     | PROTEIN NAME                                   | CYTOGENETIC LOCATION | GENE FUNCTION                                                                                                                                                                                                            | FUNCTIONAL CATEGORY* | INHERITANCE PATTERN | OMIM ENTRY |
|---------------|------------------------------------------------|----------------------|--------------------------------------------------------------------------------------------------------------------------------------------------------------------------------------------------------------------------|----------------------|---------------------|------------|
| <i>ACSL4</i>  | Acyl-CoA synthetase long chain family member 4 | Xq23                 | Conversion of free long chain fatty acids into fatty acyl-CoA esters, key intermediates in the synthesis of complex lipids, with a preference for arachidonic acid.                                                      | 5                    | XLD                 | * 300157   |
| <i>ACTB</i>   | Actin beta                                     | 7p22.1               | Regulation of cell shape and migration, regulation of gene expression, cell division, and proliferation. Association with Baraitser-Winter syndrome 1 (BWS1, OMIM # 243310) and juvenile onset dystonia (OMIM # 607371). | 2; 7                 | AD                  | * 102630   |
| <i>ACTL6A</i> | Actin-like 6A                                  | 3q26.33              | Required for maximal ATPase activity of BRG1 and formation of the BAF complex, involved in transcriptional activation of specific genes by antagonizing chromatin-mediated transcriptional repression.                   | 7                    | N.A.                | * 604958   |
| <i>ADNP</i>   | Activity-dependent neuroprotector homeobox     | 20q13.13             | Homeodomain-containing zinc finger protein with transcription factor activity. Role in organogenesis and neurogenesis and transcriptional regulation to control lineage-specificity.                                     | 7                    | AD                  | * 611386   |
| <i>AFF2</i>   | AF4/FMR2 family, member 2                      | Xq28                 | RNA-binding protein that may be involved in alternative splicing regulation through an interaction with G quartet RNA structure.                                                                                         | 7                    | XLR                 | * 300806   |
| <i>AGO1</i>   | Argonaute RISC Component 1                     | 1p34.3               | RNA interference and signaling through interaction with miRNA and siRNA                                                                                                                                                  | 7                    | N.A.                | * 606228   |
| <i>AGTR2</i>  | Angiotensin II receptor type 2                 | Xq23                 | Role in fetal development and programmed cell death through mitogen-activated protein kinases. Largely expressed in the cerebellum.                                                                                      | 8                    | XLR                 | * 300034   |
| <i>AKT3</i>   | AKT Serine/Threonine Kinase 3                  | 1q43-q44             | Role in multiple signaling pathways, particularly related to vascular, limb and brain development.                                                                                                                       | 6; 8                 | AD                  | * 611223   |

|                       |                                                                     |         |                                                                                                                                                                                                                                                                           |         |     |          |
|-----------------------|---------------------------------------------------------------------|---------|---------------------------------------------------------------------------------------------------------------------------------------------------------------------------------------------------------------------------------------------------------------------------|---------|-----|----------|
| <b><i>ALDH7A1</i></b> | Aldehyde dehydrogenase 7 family member A1                           | 5q23.2  | Aldehyde dehydrogenase involved in lysine catabolism. Linked to pyridoxine-dependent epilepsy.                                                                                                                                                                            | 5       | AR  | * 107323 |
| <b><i>ANKRD11</i></b> | Ankyrin repeat-containing cofactor 1                                | 16q24.3 | Transcriptional regulator (inhibition of ligand-dependent transactivation through recruitment of H deacetylases)                                                                                                                                                          | 7       | AD  | * 611192 |
| <b><i>APIS2</i></b>   | Adaptor-related protein complex 1 sigma 2 subunit                   | Xp22    | Subunit of the heterotetrameric adaptor protein-1 complex in the cytosolic side vesicles of the Golgi complex. Role in chlatrin recruitment and recognition of sorting signals from transmembrane receptors.                                                              | 9       | XLR | * 300629 |
| <b><i>ARHGEF6</i></b> | Rho guanine nucleotide exchange factor 6                            | Xq26.3  | Cytoplasmic protein activating the Ras-like family of Rho proteins by exchanging bound GDP for GTP. Role in the organization of the cytoskeleton, cell shape, and motility, integrin-mediated signaling leading to activation of GTPases, direction of neurite outgrowth. | 2; 6; 8 | XL  | * 300267 |
| <b><i>ARID1A</i></b>  | AT-rich interaction domain 1A                                       | 1P36.11 | Part of a chromatin-remodeling complex favoring transcriptional activation.                                                                                                                                                                                               | 7       | AD  | * 603024 |
| <b><i>ARID1B</i></b>  | AT-rich interaction domain 1B                                       | 6q25.3  | Chromatin remodeling.                                                                                                                                                                                                                                                     | 7       | AD  | * 614556 |
| <b><i>ARX</i></b>     | Aristaless related homeobox                                         | Xp21.3  | Homeodomain transcription factor with a crucial role in cerebral development and patterning.                                                                                                                                                                              | 7       | XL  | * 300382 |
| <b><i>ASH1L</i></b>   | ASH-like histone lysine methyltransferase                           | 1q22    | H3K36 methylation and transcriptional regulation, nucleotide excision repair.                                                                                                                                                                                             | 7       | AD  | * 607999 |
| <b><i>ASPM</i></b>    | Abnormal spindle-like microcephaly-associated                       | 1q31.3  | Essential role in mitotic spindle function in embryonic neuroblasts determinant of cerebral cortical size.                                                                                                                                                                | 2; 6    | AR  | * 605481 |
| <b><i>ATPIA2</i></b>  | ATPase Na <sup>+</sup> /K <sup>+</sup> transporting subunit alpha 2 | 1q23.2  | Maintainance of the Na <sup>+</sup> /K <sup>+</sup> electrochemical gradient across the plasma membrane                                                                                                                                                                   | 9       | AD  | * 610528 |

|                        |                                                            |                 |                                                                                                                                                                                                                                                                                                                                                    |         |         |          |
|------------------------|------------------------------------------------------------|-----------------|----------------------------------------------------------------------------------------------------------------------------------------------------------------------------------------------------------------------------------------------------------------------------------------------------------------------------------------------------|---------|---------|----------|
| <b><i>ATRX</i></b>     | ATRX chromatin remodeler                                   | Xq21.1          | Helicase involved in nucleotide excision repair, chromatin remodeling and transcriptional regulation, chromosomal segregation during mitosis through binding to H1P of the pericentrometric heterochromatin.                                                                                                                                       | 7       | XLD/XLR | * 300032 |
| <b><i>AUTS2</i></b>    | Activator of transcription and developmental regulator     | 7q11.22         | Part of the PRC1-AUTS2 Polycomb repressive complex involved in transcriptional activation in contrast to the canonical role of PRC1 in gene repression. Epigenetic modulation in the context of neurodevelopment and neuronal function.                                                                                                            | 6; 7    | AD      | * 607270 |
| <b><i>BRWD3</i></b>    | Bromodomain- and WD repeat-containing protein 3            | Xq13            | JAK/STAT signaling.                                                                                                                                                                                                                                                                                                                                | 8       | XLR     | * 300553 |
| <b><i>CI0orf11</i></b> | Leucine-rich melanocyte differentiation-associated protein | 10q22.2-q22.3   | Melanocyte differentiation and function. Association with oculocutaneous albinism type VII (OMIM # 615179).                                                                                                                                                                                                                                        | 7       | AR      | * 614537 |
| <b><i>CACNA1A</i></b>  | Calcium voltage-gated channel subunit alpha1 A             | 19p13           | Voltage-dependent calcium channels (this gene encodes the alpha-1A subunit, which is predominantly expressed in neuronal tissue) involved in neurotransmitter release, gene expression, and cerebellar programming and development.                                                                                                                | 6; 8    | AD      | * 601011 |
| <b><i>CACNG2</i></b>   | Calcium voltage-gated channel auxiliary subunit gamma 2    | 22q12.3         | Brain-specific transmembrane AMPA receptor regulatory protein involved in modulation of AMPA receptor trafficking and kinetics, shaping of synaptic responses. Subunit of neuronal voltage-gated calcium channels.                                                                                                                                 | 6       | AD      | * 602911 |
| <b><i>CAMK4</i></b>    | Calcium-calmodulin-dependent protein kinase                | 5q22.1          | Role in calcium-mediated activity and dynamics, particularly in the brain (neuronal transmission, synaptic plasticity, and neuronal gene expression)                                                                                                                                                                                               | 6; 8    | N.A.    | * 114080 |
| <b><i>CASK</i></b>     | Calcium/calmodulin-dependent serine protein kinase         | Xp11.4          | Ca <sup>++</sup> /calmodulin-dependent serine protein kinase, member of the membrane-associated guanylate kinase (MAGUK) family of scaffolding proteins. Role in synaptic vesicle exocytosis, formation and regulation of presynaptic and postsynaptic sites, signal transduction, cerebrocortical development through transcriptional regulation. | 6; 8; 9 | XLD     | * 300172 |
| <b><i>CC2D1A</i></b>   | Coiled-coil and C2 domain-containing 1A                    | 19p13.12        | Endocytosis regulation and endosomal trafficking.                                                                                                                                                                                                                                                                                                  | 9       | AR      | * 610055 |
| <b><i>CCDC88C</i></b>  | Coiled-coil domain-containing protein 88C                  | 14q32.11-q32.12 | Negative regulator of Wnt pathway by promoting beta-catenin degradation.                                                                                                                                                                                                                                                                           | 8       | AD/AR   | * 611204 |

|                      |                                                  |         |                                                                                                                                                                                                                                                                                             |         |     |          |
|----------------------|--------------------------------------------------|---------|---------------------------------------------------------------------------------------------------------------------------------------------------------------------------------------------------------------------------------------------------------------------------------------------|---------|-----|----------|
| <b><i>CDH15</i></b>  | Cadherin 15                                      | 16q24.3 | Glycoprotein mediating Ca <sup>2+</sup> -dependent intercellular adhesion by homophilic interactions.                                                                                                                                                                                       | 8       | AD  | * 114019 |
| <b><i>CDK13</i></b>  | Cyclin-dependent kinase 13                       | 7p14.1  | DNA damage response gene regulation, genomic stability.                                                                                                                                                                                                                                     | 3       | AD  | * 603309 |
| <b><i>CDK5RI</i></b> | Cyclin dependent kinase 5 regulatory subunit 1   | 17q11.2 | Cofactor of CDK5 (especially in brain) with a role in cell cycle regulation, development of central nervous system, and neuronal-glia interaction in radial migration.                                                                                                                      | 1; 6    | AD  | * 603460 |
| <b><i>CDKL3</i></b>  | Cyclin-dependent kinase-like 3                   | 5q31.1  | Homology to both MAP-kinases and cyclin-dependent kinases. Role in dendrite morphogenesis, positive regulation of dendrite extension and negative regulation of axonal extension.                                                                                                           | 1; 2; 8 | AD  | * 608459 |
| <b><i>CDKL5</i></b>  | Cyclin-dependent kinase-like 5                   | Xp22.13 | Kinase with tissue-specific alternative splicing (expression almost exclusively in cerebellum, cortex, hippocampus, and olfactory bulb). Role in the control of nuclear speckle morphology.                                                                                                 | 2       | XLD | * 300203 |
| <b><i>CEP83</i></b>  | Centrosomal protein 83                           | 12q22   | Docking of ciliary vesicles derived from the Golgi complex to the mother centriole for primary cilium assembly. Key component of the centriolar distal appendages. Role in regulating the mechanical features of neural progenitor cells and size and configuration of the cerebral cortex. | 2; 6; 9 | AR  | * 615847 |
| <b><i>CHD1L</i></b>  | Chromodomain helicase DNA binding protein 1 like | 1q21.1  | Chromatin remodeling and relaxation in response to DNA strand breaks through interaction with poly(ADP-ribose) (PAR).                                                                                                                                                                       | 7       | XLR | * 613039 |
| <b><i>CHD2</i></b>   | Chromodomain helicase DNA binding protein 2      | 15q26.1 | Chromatin remodeling, neural circuit and long-term memory development.                                                                                                                                                                                                                      | 6; 7    | AD  | * 602119 |
| <b><i>CHD7</i></b>   | Chromodomain helicase DNA binding protein 7      | 8q12.2  | Neural crest cell reprogramming, transcriptional regulator in the nucleoplasm, ribosomal biogenesis in the nucleolus.                                                                                                                                                                       | 7       | AD  | * 608892 |
| <b><i>CHD8</i></b>   | Chromodomain helicase DNA binding protein 8      | 14q11.2 | Nuclear protein involved in the negative regulation of Wnt signaling through binding to beta-catenin. Role in chromatin insulation and remodeling.                                                                                                                                          | 7; 8    | AD  | * 610528 |

|                        |                                                             |          |                                                                                                                                                                                                                                                                                                                                                                      |         |         |          |
|------------------------|-------------------------------------------------------------|----------|----------------------------------------------------------------------------------------------------------------------------------------------------------------------------------------------------------------------------------------------------------------------------------------------------------------------------------------------------------------------|---------|---------|----------|
| <b><i>CIC</i></b>      | Capicua transcriptional repressor                           | 19q13.2  | Transcriptional repressor. Role in cerebellar development and hypoxia tolerance.                                                                                                                                                                                                                                                                                     | 7       | AD      | * 612082 |
| <b><i>CNTNAP2</i></b>  | Contactin-associated protein-like 2                         | 7q35-q36 | Neuronal transmembrane protein of the neurexin superfamily involved in neural-glia interactions and clustering of potassium channels in myelinated axons. Enriched in circuits involved in higher cortical functions, including language.                                                                                                                            | 6       | AD/AR   | * 604569 |
| <b><i>COL4A3BP</i></b> | Collagen type IV alpha 3 binding protein                    | 5q13.3   | Hydrophilic cytoplasmic protein with a phosphatidylinositol-4-monophosphate-binding domain and a lipid transfer-catalyzing domain for intracellular trafficking of ceramide in a nonvesicular manner.                                                                                                                                                                | 5       | AD      | * 604677 |
| <b><i>CRADD</i></b>    | CASP2 and RIPK1 domain containing adaptor with death domain | 12q22    | Adaptor in DNA damage-induced apoptosis and inflammation (PIDDosome).                                                                                                                                                                                                                                                                                                | 1       | AR      | * 603454 |
| <b><i>CRBN</i></b>     | Cerebron                                                    | 3p26.2   | ATP-dependent protease involved in selective degradation of short-lived polypeptides through its ubiquitin-ligase activity, regulation of mitochondrial replication and transcription, assembly and surface expression of functional BK (Ca) channels by direct interaction with the cytosolic C-terminus of its alpha-subunit.                                      | 7; 8    | AR      | * 609262 |
| <b><i>CREBBP</i></b>   | CREB-binding protein                                        | 16p13.3  | Lysine acetyl transferase involved in histone acetylations, transcriptional regulation (together with EP300) and genomic stability (DNA repair mechanisms).                                                                                                                                                                                                          | 3; 7    | AD      | * 600140 |
| <b><i>CTNNB1</i></b>   | Catenin beta-1                                              | 3p22.11  | Adherens junction protein involved in establishment and maintenance of epithelial layers and cell adhesion. Role in intercellular signaling, anchoring of the actin cytoskeleton, regulation of normal cell growth and behavior. Transmission of the 'contact inhibition' signal to prevent further cell division. Role in dendritic morphogenesis and arborization. | 2; 6; 8 | AD      | * 116806 |
| <b><i>CTNND2</i></b>   | Catenin delta 2                                             | 5p15.2   | Armadillo-like protein (bearing a series of armadillo repeats) involved in regulation of synapse-specific transcription of Rapsyn at the neuromuscular junction, neural development and cell motility.                                                                                                                                                               | 6       | AD      | * 604275 |
| <b><i>CUL4B</i></b>    | Cullin 4B                                                   | Xq24     | Scaffold protein of the cullin 4B-RING ubiquitin ligase (E3) complex involved in regulation of cellular protein degradation, nucleotide excision repair and DNA damage response, regulation of histone methylation.                                                                                                                                                  | 3; 7    | XLR     | * 300304 |
| <b><i>DDX3X</i></b>    | DEAD-box RNA helicase3                                      | Xp11.4   | DEAD-box RNA helicase involved in cell cycle control, tumorigenesis, apoptosis, regulation of Wnt-β-catenin pathway, translation, and inflammasome assembly.                                                                                                                                                                                                         | 1; 8    | XLD/XLR | * 300160 |

|                |                                                               |          |                                                                                                                                                                                                                                                                                                                                                                                                                                               |         |       |          |
|----------------|---------------------------------------------------------------|----------|-----------------------------------------------------------------------------------------------------------------------------------------------------------------------------------------------------------------------------------------------------------------------------------------------------------------------------------------------------------------------------------------------------------------------------------------------|---------|-------|----------|
| <b>DEAF1</b>   | DEAF1 transcription factor                                    | 11p15.5  | Transcriptional activator and repressor with a possible role in early neurodevelopment. Association with Vulto-van Silfout-de Vries syndrome (VSVS, OMIM # 615828)                                                                                                                                                                                                                                                                            | 7       | AD/AR | * 602635 |
| <b>DHCR7</b>   | 7-dehydrocholesterol reductase                                | 11q13.4  | Cholesterol biosynthesis and embryonic signaling through the hedgehog pathway                                                                                                                                                                                                                                                                                                                                                                 | 5; 8    | AR    | * 602858 |
| <b>DIP2A</b>   | Disco interacting protein 2 homolog A                         | 21q22.3  | Axon pathfinding and patterning. Regulation of spine morphogenesis via acetylation of cortactin.                                                                                                                                                                                                                                                                                                                                              | 2; 6    | AD    | * 607711 |
| <b>DLG2</b>    | Discs large MAGUK scaffold protein 2                          | 11q14.1  | Regulation of the distribution and clustering of voltage-gated and ligand-gated ion channels on the neuronal surface.                                                                                                                                                                                                                                                                                                                         | 6       | N.A.  | * 603583 |
| <b>DLG3</b>    | Discs large MAGUK scaffold protein 3                          | Xq13.1   | Synapse-associated protein of the membrane-associated guanylate kinase (MAGUK) protein family involved in regulation of epithelial polarity, organization of receptors, particularly NMDA receptors (role in long-term potentiation and synaptic plasticity), and downstream signaling pathways within the synapse.                                                                                                                           | 2; 6; 8 | XLR   | * 300189 |
| <b>DOCK8</b>   | Dedicator of cytokinesis 8                                    | 9p24.3   | Organization of filamentous actin                                                                                                                                                                                                                                                                                                                                                                                                             | 2       | AD    | * 611432 |
| <b>DSCAM</b>   | Down Syndrome cell adhesion molecule                          | 21q22.2  | Cell adhesion molecule of the immunoglobulin superfamily expressed mainly in the brain with different neuron-specific isoforms. Role in axonal pathfinding, neuronal wiring, self-recognition and heteroneuronal self-avoidance.                                                                                                                                                                                                              | 2; 6    | AD    | * 602523 |
| <b>DYNC1H1</b> | Dynein cytoplasmic 1 heavy chain 1                            | 14q32.31 | Subunit of the cytoplasmic dynein complex, microtubule-activated ATPases converting chemical energy into mechanical energy. Role in intracellular motility, retrograde axonal transport, protein sorting, and redistribution of organelles, mitotic spindle formation and neuronal migration.                                                                                                                                                 | 2; 6    | AD    | * 600112 |
| <b>DYRK1A</b>  | Dual-specificity tyrosine phosphorylation-regulated kinase 1A | 21q22.13 | Role in several cellular processes generally resulting in increased cellular proliferation and reduced apoptosis. Role in microtubule stability in growing axons. Phosphorylation of alpha-synuclein to facilitate its intracytoplasmic aggregation (possible association with alpha-synucleinopathies). Phosphorylation of tau, reducing its function in microtubule assembly (possible role in Down syndrome-associated Alzheimer disease). | 1; 2; 6 | AD    | * 600855 |

|                       |                                                |          |                                                                                                                                                                                                                                                                                                                                                                                                                                                                                      |         |     |          |
|-----------------------|------------------------------------------------|----------|--------------------------------------------------------------------------------------------------------------------------------------------------------------------------------------------------------------------------------------------------------------------------------------------------------------------------------------------------------------------------------------------------------------------------------------------------------------------------------------|---------|-----|----------|
| <b><i>EHMT1</i></b>   | Euchromatic histone lysine methyltransferase 1 | 9q34.3   | Methyltransferase with transcriptional repression activity through methylation of lysine-9 of histone H3. Potential role in frontal cortex aging and in age-related behavioral deterioration.                                                                                                                                                                                                                                                                                        | 7       | AD  | * 607001 |
| <b><i>EP300</i></b>   | E1A-binding protein                            | 22q13.2  | Histone acetyltransferase with a role in transcriptional regulation and DNA repair.                                                                                                                                                                                                                                                                                                                                                                                                  | 3; 7    | AD  | * 602700 |
| <b><i>EPB41L1</i></b> | Erythrocyte membrane protein band 4.1 like 1   | 20q11.23 | Interactions between the erythrocyte cytoskeleton and the overlying plasma membrane, regulation of AMPA receptor expression at the synaptic membrane.                                                                                                                                                                                                                                                                                                                                | 2; 6    | AD  | * 602879 |
| <b><i>FBXO11</i></b>  | F-box only protein 11                          | 2p16.3   | Methyltransferase activity. transcriptional regulation, silencing of p53 and of the mismatch repair gene MSH6.                                                                                                                                                                                                                                                                                                                                                                       | 3; 7    | AD  | * 607871 |
| <b><i>FGDI</i></b>    | FYVE, RhoGEF and PH domain containing 1        | Xp11.21  | Guanine nucleotide exchange factor (GEF) involved in regulation of subcortical actin cytoskeleton and Golgi complex, excretory cell morphogenesis and cellular organization, regulation of cell shape together with cortactin and mammalian actin-binding protein-1 mAbp1), invadopodia biogenesis and extracellular matrix degradation in cancer.                                                                                                                                   | 2       | XLR | * 300546 |
| <b><i>FMRI</i></b>    | FMR1 antisense RNA 1                           | Xq27.3   | Polysome-associated protein involved in mRNA trafficking and translational control, regulation of microtubule dynamics, and translation-independent modulation of presynaptic action potential. Possible role in the DNA damage response. The expansion of a trinucleotide repeat (CGG) in the 5' UTR to 55-230 copies is associated with fragile X syndrome (OMIM # 300624), fragile X tremor/ataxia syndrome (OMIM # 300623), and premature ovarian failure (POF1, OMIM # 311360). | 3; 6; 7 | XLR | * 300805 |
| <b><i>FOXG1</i></b>   | Forkhead box G1B                               | 14q12    | Transcriptional repressor involved in control of neuronal migration and formation of cortico-cortical callosal projections.                                                                                                                                                                                                                                                                                                                                                          | 6; 7    | AD  | * 164874 |
| <b><i>FOXPI</i></b>   | Forkhead box P1                                | 3p13     | Transcriptional repressor involved in monocyte differentiation and macrophage function, pooling and columnar organization of spinal motor neurons.                                                                                                                                                                                                                                                                                                                                   | 6; 7    | AD  | * 605515 |
| <b><i>FTSJ1</i></b>   | FTSJ RNA 2-prime-O-methyltransferase 1         | Xp11.23  | Nucleolar methyltransferase involved in ribosomal stability.                                                                                                                                                                                                                                                                                                                                                                                                                         | 7       | XLR | * 300499 |

|                |                                           |          |                                                                                                                                                                                                                                                                                                                                                                                                                                                    |   |       |          |
|----------------|-------------------------------------------|----------|----------------------------------------------------------------------------------------------------------------------------------------------------------------------------------------------------------------------------------------------------------------------------------------------------------------------------------------------------------------------------------------------------------------------------------------------------|---|-------|----------|
| <b>GABRA1</b>  | Gamma-aminobutyrric acid receptor alpha-1 | 5q34     | Pentameric ligand-gated chloride channel acting as the receptor of the brain major inhibitory neurotransmitter, GABA, and site of action of a number of important pharmacologic agents including barbiturates, benzodiazepines, and ethanol. Association with developmental and epileptic encephalopathy (OMIM # 615744) and susceptibility to childhood absence and juvenile myoclonic epilepsy (OMIM # 611136).                                  | 6 | AD    | * 602523 |
| <b>GABRB3</b>  | Gamma-aminobutyrric acid receptor beta-3  | 15q12    | Member of the GABA-A receptor gene family of heteromeric pentameric ligand-gated ion channels involved in GABA-ergic (inhibitory) neurotransmission<br>Association with childhood absence and juvenile myoclonic epilepsy (OMIM # 611136) and with developmental and epileptic encephalopathy (OMIM # 615744).                                                                                                                                     | 6 | AD    | * 137192 |
| <b>GATAD2B</b> | GATA zinc finger domain containing 2B     | 1q21.3   | Regulation of transcription by linking 2 independent chromatin-regulating activities: histone deacetylation and ATP-dependent nucleosome remodeling.                                                                                                                                                                                                                                                                                               | 7 | AD    | * 614998 |
| <b>GDI1</b>    | GDP dissociation inhibitor 1              | Xq28     | Vesicular trafficking, it recycles Rab proteins and keeps a reservoir of available Rab proteins in the cytosol by extracting them from membranes and by solubilizing them.                                                                                                                                                                                                                                                                         | 9 | XLD   | * 300104 |
| <b>GLDC</b>    | Glycine decarboxylase                     | 9p24.1   | Pyridoxal phosphate-dependent glycine decarboxylase, P protein part of an enzymatic complex (P, L, H, T) involved in glycine cleavage in mitochondria                                                                                                                                                                                                                                                                                              | 5 | AD/AR | * 238300 |
| <b>GNAS</b>    | GNAS Complex Locus                        | 20q13.32 | Imprinted complex locus encoding 4 transcripts (Gs-alpha, XLAS, NESP55, and the A/B transcript, as well as an antisense GNAS transcript, GNASAS). Gs-alpha is expressed biallelically in nearly all tissues. Other transcripts produced by GNAS are expressed exclusively from either the paternal or the maternal GNAS allele.<br>Association with pseudohypoparathyroidism (OMIM # 612463) and progressive osseous heteroplasia (OMIM # 166350). | 8 | AD    | * 139320 |
| <b>GNBI</b>    | Guanine nucleotide-binding protein beta-1 | 1p36.33  | Subunit of G proteins, involved in extracellular signal transduction.                                                                                                                                                                                                                                                                                                                                                                              | 8 | AD    | * 139380 |
| <b>GPD2</b>    | Glycerol-3-phosphate dehydrogenase 2      | 2q24.1   | Glycerol-phosphate shuttle: conversion of G-3-P into dihydroxyacetone phosphate (DHAP) with concomitant reduction of FAD to transfer reducing equivalents into mitochondria and reoxidize NADH.                                                                                                                                                                                                                                                    | 5 | AD    | * 138430 |



|               |                                                                          |         |                                                                                                                                                                                                                                                                                                           |      |       |          |
|---------------|--------------------------------------------------------------------------|---------|-----------------------------------------------------------------------------------------------------------------------------------------------------------------------------------------------------------------------------------------------------------------------------------------------------------|------|-------|----------|
| <b>GRIA3</b>  | Glutamate ionotropic receptor AMPA type subunit 3                        | Xq25    | Glutamate receptor involved in synaptic plasticity, learning and memory.                                                                                                                                                                                                                                  | 6    | XLR   | * 305915 |
| <b>GRIK2</b>  | Glutamate ionotropic receptor kainate type subunit 2                     | 6q16.3  | Short- and long-term plasticity in hippocampal mossy fibers and modulators of synaptic strength.                                                                                                                                                                                                          | 6    | AR    | * 138244 |
| <b>GRIN1</b>  | Glutamate ionotropic receptor N-methyl-D-aspartate (NMDA) type subunit 1 | 9q34.3  | Synaptic function, dendritic arborization, synaptic plasticity, neuronal survival, potential for excitotoxicity.                                                                                                                                                                                          | 6    | AD/AR | * 138249 |
| <b>GRIN2A</b> | Glutamate ionotropic receptor NMDA type subunit 2A                       | 16p13.2 | Neuronal excitability, synaptic plasticity and neuronal morphogenesis. Role in memory formation signaling cascades.                                                                                                                                                                                       | 6    | AD    | * 138253 |
| <b>GRIN2B</b> | Glutamate-activated NMDA receptor subunit 2B                             | 12p13.1 | Neuronal excitability, synaptic plasticity and neuronal morphogenesis.                                                                                                                                                                                                                                    | 6    | AD    | * 138252 |
| <b>HCFC1</b>  | Host cell factor C1                                                      | Xq28    | Transcriptional regulation, regulation of embryonic neural development.                                                                                                                                                                                                                                   | 7    | XLR   | * 300019 |
| <b>HDAC2</b>  | Histone deacetylase 2                                                    | 6q21    | Zinc-finger transcription factor involved in positive and negative transcriptional regulation of consensus DNA elements at gene promoters through histone deacetylation. Modulation of synaptic plasticity and long-lasting changes of neural circuits, involvement in learning and memory.               | 6; 7 | N.A.  | * 605164 |
| <b>HDAC4</b>  | Histone deacetylase 4                                                    | 2q37.3  | Class II histone deacetylase targeting all 4 histones, chromatin remodeling.                                                                                                                                                                                                                              | 7    | XLR   | * 605314 |
| <b>HNMT</b>   | Histamine N-methyltransferase                                            | 2q22.1  | N(tau)-methylation of histamine using S-adenosyl-L-methionine as the methyl donor and control of its neurotransmitter activity in the brain.                                                                                                                                                              | 6    | AR    | * 605238 |
| <b>HPRT1</b>  | Hypoxanthine-guanine phosphoribosyltransferase 1                         | Xq26.2  | Generation of purine nucleotides through the purine salvage pathway (conversion of hypoxanthine to inosine monophosphate and guanine to guanosine monophosphate via transfer of the 5-phosphoribosyl group from 5-phosphoribosyl 1-pyrophosphate). Association with Lesch-Nyhan syndrome (OMIM # 300322). | 5    | XLR   | * 308000 |

|                        |                                                                              |              |                                                                                                                                                                                                                                                                    |      |     |          |
|------------------------|------------------------------------------------------------------------------|--------------|--------------------------------------------------------------------------------------------------------------------------------------------------------------------------------------------------------------------------------------------------------------------|------|-----|----------|
| <b><i>HUWE1</i></b>    | HECT, UBA, and WWE domains-containing protein 1                              | Xp11.2       | Ubiquitin ligase involved in several cellular processes, including neurogenesis, neural proliferation and synaptogenesis. Association with Turner type X-linked mental retardation (OMIM # 309590).                                                                | 6; 8 | XL  | * 300697 |
| <b><i>IDS</i></b>      | Iduronate 2-sulfatase                                                        | Xq28         | Lysosomal degradation of the glycosaminoglycans heparan sulfate and dermatan sulfate. Association with mucopolysaccharidosis type II (Hunter syndrome, OMIM # 309900).                                                                                             | 5    | XLR | * 300823 |
| <b><i>ILIRAPL1</i></b> | Interleukin 1 receptor accessory protein like 1                              | Xp21.3-p21.2 | High levels of expression in brain neurons. Regulation of neurite outgrowth and exocytosis via its interaction with neuronal calcium sensors and the downregulation of calcium channels, regulation of synaptic formation and modulation of synaptic transmission. | 6    | XLR | * 300206 |
| <b><i>IQSEC2</i></b>   | IQ motif and SEC7 domain-containing protein 2                                | Xp11.22      | GDP-GTP exchange factor involved in neuronal development and synaptic plasticity (cytoskeletal organization, dendritic spine formation and morphology, and excitatory synaptic organization).                                                                      | 6; 8 | XLD | * 300522 |
| <b><i>JARID2</i></b>   | JUMONJI, AT-rich interactive domain 2                                        | 6p22.3       | Regulator of histone methyltransferase complexes, transcriptional repression by binding to the Polycomb repressive complex 2 (PRC2), neural tube formation.                                                                                                        | 7    | AD  | * 601594 |
| <b><i>KANK1</i></b>    | KN motif and ankyrin repeat domains 1                                        | 9p24.3       | Regulation of actin polymerization and inhibition of cell migration, regulation of Rho GTPases in podocytes. Possible association with nephrotic syndrome). Maternally imprinted gene.                                                                             | 2    | AD  | * 607704 |
| <b><i>KANSL1</i></b>   | KAT8 regulatory NSL complex subunit 1                                        | 17q21.31     | Nuclear protein belonging to the histone acetyltransferase complex with a role in chromatin modification through acetylation of histone 4.                                                                                                                         | 7    | AD  | * 612452 |
| <b><i>KAT6B</i></b>    | Lysine acetyltransferase 6B                                                  | 10q22.2      | Histone acetyltransferase and transcriptional regulator.                                                                                                                                                                                                           | 7    | AD  | * 605880 |
| <b><i>KATNAL1</i></b>  | Katanin catalytic subunit A1 like 1                                          | 13q12.3      | Microtubule organization. Essential for spermiogenesis and male fertility.                                                                                                                                                                                         | 2    | AD  | * 614764 |
| <b><i>KCNAB1</i></b>   | Potassium voltage-gated channel subfamily A member regulatory beta subunit 1 | 3q25.31      | Part of the Shaker-related family of potassium channels involved in determination of the electrical properties of excitable cells.                                                                                                                                 | 4; 6 | AD  | * 601141 |

|                       |                                                        |          |                                                                                                                                                                                                                                                                                         |         |     |          |
|-----------------------|--------------------------------------------------------|----------|-----------------------------------------------------------------------------------------------------------------------------------------------------------------------------------------------------------------------------------------------------------------------------------------|---------|-----|----------|
| <b><i>KCNQ2</i></b>   | Voltage-gated potassium channel, subfamily Q, member 2 | 20q13.33 | Voltage-gated potassium channel involved in neuronal excitability and synaptic response.                                                                                                                                                                                                | 4; 6    | AD  | * 602235 |
| <b><i>KCNT1</i></b>   | Potassium channel, subfamily T, member 1               | 9q34.3   | Na-activated K channel contributing to neuronal hyperpolarization following repetitive firing.<br>Interaction with FMRP (possible link between changes in protein translation and neuronal firing).                                                                                     | 6       | AD  | * 608167 |
| <b><i>KDM5B</i></b>   | Lysine demethylase 5B                                  | 11q13.2  | H3K4 demethylation --> gene repression                                                                                                                                                                                                                                                  | 6; 7    | AR  | * 605393 |
| <b><i>KDM5C</i></b>   | Lysine demethylase 5C                                  | Xp11.22  | H3K4me3 and H3K4me2 demethylase, transcriptional repressor through the RE-1-silencing transcription factor (REST) complex. Role in brain function.                                                                                                                                      | 6; 7    | XLR | * 314690 |
| <b><i>KDM6A</i></b>   | Lysine demethylase 6A                                  | Xp11.3   | Removal of histone H3 lys27 repressive trimethylation (H3K27me3).<br>Role in anteroposterior embryonic development.                                                                                                                                                                     | 7       | XLD | * 300128 |
| <b><i>KIRREL3</i></b> | Kirre-like nephrin family adhesion molecule 3          | 11q24.2  | Part of the immunoglobulin superfamily proteins interacting with the C-terminus of podocin. Role in neuronal migration, axonal fasciculation, and synapse formation and scaffolding.                                                                                                    | 2; 6    | AD  | * 607761 |
| <b><i>KMT2A</i></b>   | Lysine-specific methyltransferase 2A                   | 11q23.3  | H3K4 methylation, chromatin remodeling and positive regulation of gene expression, neurogenesis in postnatal brain, maintenance of regionally distinct developmental programs in the forebrain through epigenetic mechanisms, DNA damage response and S-phase checkpoint.               | 1; 6; 7 | AD  | * 159555 |
| <b><i>KMT2D</i></b>   | Lysine-specific methyltransferase 2D                   | 12q13.12 | Chromatin remodeling through H3K4me3 methylation.                                                                                                                                                                                                                                       | 7       | AD  | * 602113 |
| <b><i>KMT5B</i></b>   | Lysine methyltransferase 5B                            | 11q13.2  | Nucleosomal histone H4 trimethylation.                                                                                                                                                                                                                                                  | 7       | AD  | * 610881 |
| <b><i>LICAM</i></b>   | L1 cell adhesion molecule                              | Xq28     | Integral membrane glycoprotein belonging to the immunoglobulin superfamily cell adhesion molecules (CAMs), mediation of cell-to-cell adhesion at the cell surface. Expressed primarily in the nervous system, acting as a neural recognition molecule. Association with agenesis of the | 6; 8    | XLR | * 308840 |

|               |                                                  |              |                                                                                                                                                                                                                                                                                                                       |      |         |          |
|---------------|--------------------------------------------------|--------------|-----------------------------------------------------------------------------------------------------------------------------------------------------------------------------------------------------------------------------------------------------------------------------------------------------------------------|------|---------|----------|
|               |                                                  |              | corpus callosum, hydrocephalus and CRASH and MASA syndromes (hereditary spastic paraplegias, OMIM # 303350).                                                                                                                                                                                                          |      |         |          |
| <b>LAMAI</b>  | Laminin alpha-1                                  | 18p11.31     | Basement membrane protein                                                                                                                                                                                                                                                                                             | 2    | AR      | * 150320 |
| <b>LARGE1</b> | Acetylglucosaminyltransferase-like protein       | 22q12.3      | Member of the N-acetylglucosaminyltransferase gene family involved in glycosylation of alpha-dystroglycan and synthesis of glycoprotein and glycosphingolipid sugar chains. Association with congenital muscular dystrophy-dystroglycanopathy with mental retardation type A6 (OMIM # 613154) and B6 (OMIM # 608840). | 5    | AR      | * 603590 |
| <b>LINS1</b>  | LINES homolog 1                                  | 15q26.3      | Modulator of WnT signaling pathway.                                                                                                                                                                                                                                                                                   | 8    | AR      | * 610350 |
| <b>MAGEL2</b> | MAGE-like 2                                      | 15q11.2      | Ubiquitin ligase enhancer required for endosomal protein recycling. Role in brain development, hypothalamic function, possible role in circadian rythm control and age at menarche determination with a parent-of-origing imprinting effect. Association with Schaaf-Yang syndrome (OMIM # 615547).                   | 6; 9 | AD      | * 605283 |
| <b>MAGT1</b>  | Magnesium transporter 1                          | Xq13.1-q13.2 | Magnesium transport. Association with X-linked immunodeficiency with magnesium defect and congenital disorder of glycosylation.                                                                                                                                                                                       | 4    | XLR     | * 300715 |
| <b>MAP3K7</b> | Mitogen-activated protein kinase kinase kinase 7 | 6q15         | Kinase-mediated cascade signaling pathways, immune response, TGF- $\beta$ signaling.                                                                                                                                                                                                                                  | 8    | AD      | * 602614 |
| <b>MBD5</b>   | Methyl-CpG-binding domain protein 5              | 2q23.1       | DNA methylation and chromatin remodeling.                                                                                                                                                                                                                                                                             | 7    | AD      | * 611472 |
| <b>MECP2</b>  | Methyl-CpG binding protein 2                     | Xq28         | Transcriptional regulation through CpG island methylation, neuronal maturation, modulator of activity-dependent BDNF gene.                                                                                                                                                                                            | 6; 7 | XLD/XLR | * 300005 |
| <b>MED12</b>  | Mediator complex subunit 12                      | Xq13.1       | Transcriptional repression of neuron-specific genes in non-neuronal cell lines.                                                                                                                                                                                                                                       | 7    | XLR     | * 300188 |

|                      |                                                       |               |                                                                                                                                                                                                                                                                                                                                                        |            |         |          |
|----------------------|-------------------------------------------------------|---------------|--------------------------------------------------------------------------------------------------------------------------------------------------------------------------------------------------------------------------------------------------------------------------------------------------------------------------------------------------------|------------|---------|----------|
| <b><i>MED13L</i></b> | Mediator complex subunit 13-like                      | 12q24.21      | Transcriptional coactivator involved in embryogenesis, especially in brain and heart development, as part of the THRAP2 (thyroid hormone receptor associated protein 2) complex.                                                                                                                                                                       | 6; 7       | AD      | * 608771 |
| <b><i>MED23</i></b>  | Mediator complex subunit 23                           | 6q23.2        | Cofactor in transcriptional activation, role in brain development                                                                                                                                                                                                                                                                                      | 6; 7       | AR      | * 605042 |
| <b><i>MID2</i></b>   | Midline 2                                             | Xq22          | E3 ubiquitin ligase involved in microtubule stabilization.                                                                                                                                                                                                                                                                                             | 2          | XLR     | * 300204 |
| <b><i>MTOR</i></b>   | Mechanistic target of rapamycin                       | 1p36.22       | Protein kinase belonging to TOR complex-1 (TORC1), involved in regulation of cell growth and proliferation and mRNA translation, and TOR complex-2 (TORC2), involved in cell cycle regulation, actin cytoskeletal rearrangement, and cell survival. Role in synaptic plasticity and cancer. Association with Smith-Kingsmore syndrome (OMIM # 616638). | 1; 2; 6; 7 | AD      | * 601231 |
| <b><i>NAA10</i></b>  | N(alpha)-acetyltransferase 10, NatA catalytic subunit | Xq28          | Post-translational alpha acetylation of proteins and peptides, neuronal differentiation.                                                                                                                                                                                                                                                               | 6; 7       | XLD/XLR | * 300013 |
| <b><i>NAA15</i></b>  | N(alpha)-acetyltransferase 15                         | 4q31.1        | Posttranslational protein modification by tethering the NatA N-acetyltransferase complex to the ribosome. Role in neuron generation and differentiation.                                                                                                                                                                                               | 6; 7       | AD      | * 608000 |
| <b><i>NALCN</i></b>  | Sodium-leak channel, nonselective                     | 13q32.3-q33.1 | Voltage-independent Na <sup>+</sup> , K <sup>+</sup> , and Ca <sup>++</sup> channel responsible for the neuronal background sodium leak conductance --> control of neuronal excitability                                                                                                                                                               | 4; 6       | AD      | * 600853 |
| <b><i>NDN</i></b>    | Necdin                                                | 15q11.2       | Transcriptional regulation, neural differentiation and brain development. Association with Prader-Willi syndrome (OMIM # 176270).                                                                                                                                                                                                                      | 6; 7       | AD      | * 602117 |
| <b><i>NDST1</i></b>  | N-deacetylase-sulfotransferase 1                      | 5q33.1        | Heparan sulphate biosynthesis                                                                                                                                                                                                                                                                                                                          | 5          | AR      | * 600853 |
| <b><i>NEXMIF</i></b> | Neurite extension and migration factor                | Xq13.2        | Mainly expressed in the cerebral cortex and cerebellum. Role in neuron development and brain function. Involvement in neurite outgrowth by regulating cell-cell adhesion via the N-cadherin signaling pathway. Regulation of gene expression.                                                                                                          | 6; 7; 8    | XLD     | * 300524 |

|                      |                                                |          |                                                                                                                                                                                                                                                                                                   |         |         |          |
|----------------------|------------------------------------------------|----------|---------------------------------------------------------------------------------------------------------------------------------------------------------------------------------------------------------------------------------------------------------------------------------------------------|---------|---------|----------|
| <b><i>NFIX</i></b>   | Nuclear factor I/X                             | 19p13.13 | Role in hippocampal-dependent behavior, early B lymphopoiesis and myelopoiesis, neural stem/progenitor cell fate, and cell proliferation, migration, and gene expression in the subventricular zone. Association with Sotos syndrome (OMIM # 614753) and Marshall-Smith syndrome (OMIM # 602535). | 1; 6; 7 | AD      | * 164005 |
| <b><i>NIPAI</i></b>  | NIPA magnesium transporter 1                   | 15q11.2  | Membrane transporter or receptor. Inhibition of BMP signaling (important for distal axonal function).                                                                                                                                                                                             | 6; 8    | AD      | * 608145 |
| <b><i>NIPBL</i></b>  | NIPBL cohesin loading factor                   | 5p13.2   | Sister chromatids cohesion through loading of the cohesin complex. Loop extrusion during genome organization.                                                                                                                                                                                     | 3       | AD      | * 608667 |
| <b><i>NLGN1</i></b>  | Neuroigin 1                                    | 3q26.31  | Ca <sup>++</sup> -dependent postsynaptic transmembrane protein involved in synaptogenesis, synaptic plasticity and excitatory-inhibitory balance by interacting with presynaptic neurexins with an interactive specificity according to the splicing status of both.                              | 6       | AD      | * 600568 |
| <b><i>NLGN3</i></b>  | Neuroigin 3                                    | Xq13.1   | Astrocyte morphogenesis and synaptogenesis.                                                                                                                                                                                                                                                       | 6       | XL      | * 300336 |
| <b><i>NLGN4X</i></b> | Neuroigin 4, X-linked                          | Xp22.33  | Role in synaptogenesis. Association with autism and Asperger syndrome (OMIM # 300497).                                                                                                                                                                                                            | 6       | XL      | * 300427 |
| <b><i>NRXN1</i></b>  | Neurexin 1                                     | 2p16.3   | Neuroigin-binding cell-surface receptor predominantly expressed in brain and forming a Ca <sup>2+</sup> -dependent neurexin/neuroigin complex at synapses in the central nervous system for efficient neurotransmission and formation of synaptic contacts.                                       | 6       | AD/AR   | * 600565 |
| <b><i>NSDHL</i></b>  | NAD(P)H steroid dehydrogenase-like protein     | Xq28     | C4 demethylase involved in postsqualene cholesterol biosynthesis. Association with CHILD syndrome (OMIM # 308050) and CK syndrome (OMIM # 300831).                                                                                                                                                | 5       | XLD/XLR | * 300275 |
| <b><i>NSUN2</i></b>  | NOP2/SUN RNA methyltransferase family member 2 | 5p15.31  | Maturation of cytoplasmic tRNAs and protein translation.                                                                                                                                                                                                                                          | 7       | AR      | * 610916 |

|                      |                                                         |          |                                                                                                                                                                                                                                                                                                                                                                             |         |      |          |
|----------------------|---------------------------------------------------------|----------|-----------------------------------------------------------------------------------------------------------------------------------------------------------------------------------------------------------------------------------------------------------------------------------------------------------------------------------------------------------------------------|---------|------|----------|
| <b><i>NTM</i></b>    | Neurotrimin                                             | 11q25    | Part of the IgLON family of GPI-anchored cell adhesion molecules (belonging to the immunoglobulin domain-containing superfamily). Neural adhesion molecule with a role in developing projection systems.                                                                                                                                                                    | 6; 8    | N.A. | * 607938 |
| <b><i>OMG</i></b>    | Oligodendrocyte myelin glycoprotein                     | 17q11.2  | Gene embedded within an intron of the NF1 (neurofibromin 1) with growth suppressive effects. Downregulation of mitogenic signaling pathways, inhibition of neurite outgrowth, possible role in disorders of cell proliferation, such as neurofibromatosis type I.                                                                                                           | 1; 6; 8 | AD   | * 164345 |
| <b><i>OPHN1</i></b>  | Oligophrenin 1                                          | Xq12     | Rho GTPase-activating protein. Role in activity-dependent maturation and plasticity of excitatory synapses by controlling their structural and functional stability (selective enhancement of AMPA-receptor-mediated synaptic transmission, spine size control by stabilizing synaptic AMPA receptors). Interaction with proteins involved in clathrin-mediated endocytosis | 6; 8    | XLR  | * 300127 |
| <b><i>PAK3</i></b>   | p21 protein (Cdc42/Rac)-activated kinase 3              | Xq23     | Critical regulator of signal transduction pathways by linking Rho-GTPases with actin cytoskeleton and Map kinase cascades. Coordination of neuronal complexity, synaptic properties and dendrite/axon growth                                                                                                                                                                | 6; 8    | XLR  | * 300142 |
| <b><i>PCDH19</i></b> | Protocadherin 19                                        | Xq22.1   | Calcium-dependent cell adhesion molecule involved in cortex and hippocampus development likely through adhesion-based self-organization.                                                                                                                                                                                                                                    | 6; 8    | XL   | * 300460 |
| <b><i>PHF6</i></b>   | PHD finger protein 6                                    | Xq26.3   | Nucleolar protein with a likely role in transcription. Association with Borjeson-Forsman-Lehmann syndrome (OMIM # 301900).                                                                                                                                                                                                                                                  | 7       | XLR  | * 300414 |
| <b><i>PHF8</i></b>   | PHD finger protein 8                                    | Xp11.22  | Fe(II) and 2-oxoglutarate-dependent N-epsilon-methyl lysine demethylase acting on histone substrates. Role in brain and craniofacial development. Function dependent on oxygen availability (possible link between maternal hypoxia and facial clefting).                                                                                                                   | 6; 7    | XLR  | * 300560 |
| <b><i>PHIP</i></b>   | Pleckstrin homology domain interacting protein          | 6q14.1   | Insulin signaling modulation, pancreatic beta cell growth and survival by binding to the insulin receptor substrate-1 (IRS-1). Role in substrate-specific proteolysis in a ubiquitin ligase pathway.                                                                                                                                                                        | 8       | AD   | * 612870 |
| <b><i>PIGN</i></b>   | Phosphatidylinositol glycan anchor biosynthesis class N | 18q21.33 | GPI-anchor biosynthesis, protein trafficking from the site of synthesis to the cell membrane, suppression of chromosomal instability.                                                                                                                                                                                                                                       | 3; 8; 9 | AR   | * 606097 |

|                      |                                                                 |          |                                                                                                                                                                                                                                                                   |      |       |          |
|----------------------|-----------------------------------------------------------------|----------|-------------------------------------------------------------------------------------------------------------------------------------------------------------------------------------------------------------------------------------------------------------------|------|-------|----------|
| <b><i>PIGY</i></b>   | Phosphatidylinositol glycan anchor biosynthesis class Y protein | 4q22.1   | Biosynthesis of GPI, an important membrane anchor for many cellular proteins. Association with hyperphosphatasia with mental retardation syndrome 6 (OMIM # 616809).                                                                                              | 8    | AR    | * 610662 |
| <b><i>PNPLA4</i></b> | Patatin-like phospholipase domain containing 4                  | Xp22.31  | Mitochondrial triacylglycerol lipase and transacytlase involved in mitochondrial oxidative phosphorylation. Highly expressed in brain and skeletal muscle.                                                                                                        | 5    | XLR   | * 300102 |
| <b><i>POGZ</i></b>   | Pogo transposable element with ZNF domain                       | 11q21.3  | Mitotic progression through dissociation of the heterochromatin-forming HP1-alpha from chromosome arms and activation of Aurora kinase B.                                                                                                                         | 1    | AD    | * 614787 |
| <b><i>PQBPI</i></b>  | Polyglutamine-binding protein 1                                 | Xp11.23  | Nuclear polyglutamine-binding protein, negative regulation of transcription through binding to RNA. Association with Renpenning syndrome (OMIM # 309500).                                                                                                         | 7    | XLR   | * 300463 |
| <b><i>PRRT2</i></b>  | Proline-rich transmembrane protein 2                            | 16p11.2  | Axonal protein interacting with SNAP-25 and t-SNARE.                                                                                                                                                                                                              | 6    | AD    | * 614386 |
| <b><i>PRSSI2</i></b> | Serine protease 12                                              | 4q26     | Extracellular multidomain serine protease associated with neural development and plasticity.                                                                                                                                                                      | 6    | AR    | * 606709 |
| <b><i>PTCHD1</i></b> | Patched domain-containing protein 1                             | Xp22.11  | Role in the hedgehog signaling pathway. Association with autism susceptibility.                                                                                                                                                                                   | 8    | XLR   | * 300828 |
| <b><i>PTEN</i></b>   | Phosphatase and tensin homolog                                  | 10q23.31 | Tumor suppressor dual-specificity phosphatase involved in negative regulation of PI3K and MAPK pathways. Possible role in inhibition of cell adhesion and migration, regulation of phosphatidylinositol signaling pathways, cell cycle and apoptosis.             | 1; 8 | AD/AR | * 601728 |
| <b><i>PTPN11</i></b> | Protein tyrosine phosphatase nonreceptor-type 11                | 12q24.13 | Regulation of cellular response to extracellular signals by regulating the phosphotyrosine content of specific intracellular proteins. Association with LEOPARD syndrome (OMIM # 151100), Noonan syndrome (OMIM # 163950) and metachondromatosis (OMIM # 156250). | 1    | AD    | * 176876 |
| <b><i>RAB38B</i></b> | Member RAS oncogene family                                      | Xq28     | GTPase involved in the regulation of vesicular trafficking between membrane compartments, neuronal development and neurite extension, alpha-synuclein homeostasis.                                                                                                | 6;9  | XLR   | * 300774 |



|                       |                                              |                 |                                                                                                                                                                                                                                                                                                                                |         |       |          |
|-----------------------|----------------------------------------------|-----------------|--------------------------------------------------------------------------------------------------------------------------------------------------------------------------------------------------------------------------------------------------------------------------------------------------------------------------------|---------|-------|----------|
| <b><i>RAD21</i></b>   | RAD21 cohesin complex component              | 8q24.11         | Part of a cohesin complex involved in sister chromatids cohesion during cell division. Role in transcriptional insulation. Association with Mungan syndrome (OMIM # 611376) and Cornelia De Lange syndrome (OMIM # 614701).                                                                                                    | 3; 7    | AD/AR | * 606462 |
| <b><i>RAI1</i></b>    | Retinoic acid-induced 1                      | 17p11.2         | Positive transcriptional regulator of CLOCK gene, regulation of circadian rhythm.                                                                                                                                                                                                                                              | 7       | AD    | * 607642 |
| <b><i>RBFOX1</i></b>  | RNA-binding FOX1 homolog 1                   | 16p13.3         | Positive or negative regulation of tissue-specific splicing by binding to the element (U)GCAUG in mRNA precursors. Role in synaptic structure and function.                                                                                                                                                                    | 6; 7    | N.A.  | * 605104 |
| <b><i>RBM19</i></b>   | RNA-binding motif protein 19                 | 12q24.13-q24.21 | RNA-binding protein during ribosome biogenesis.                                                                                                                                                                                                                                                                                | 7       | N.A.  | * 616444 |
| <b><i>RELN</i></b>    | Reelin                                       | 7q22.1          | Secreted glycoprotein produced by specific cell types within the developing brain. Role in activation of signaling pathways in postmitotic migrating neurons, proper positioning of neurons and neuronal layering during brain development, microtubule function in neurons. Possible role as a barrier to neuronal migration. | 2; 6; 8 | AD/AR | * 600514 |
| <b><i>RPS6KA3</i></b> | Ribosomal protein S6 kinase A3               | Xp22.2-p22.1    | Growth factor-regulated serine/threonine kinase with a role in cell cycle progression, differentiation, and cell survival. Prominent expression in developing neural and sensory tissues. Association with Coffin-Lowrie syndrome (OMIM # 303600).                                                                             | 1; 8    | XLD   | * 300075 |
| <b><i>SALL1</i></b>   | SAL-like 1                                   | 16q12.1         | Transcription regulation, regulation of higher-order chromatin structures. Regulation of ciliary function during embryogenesis.                                                                                                                                                                                                | 7       | AD    | * 602218 |
| <b><i>SATB2</i></b>   | Special AT-rich sequence-binding protein 2   | 2q33.1          | Nuclear matrix DNA-binding protein specifically binding to genomic nuclear matrix attachment regions. Role in transcriptional regulation and chromatin remodeling. Association with Glass syndrome (OMIM# 612313).                                                                                                             | 7       | AD    | * 608148 |
| <b><i>SCN1A</i></b>   | Sodium voltage-gated channel alpha subunit 1 | 2q24.3          | Subunit of voltage-sensitive sodium channel (essential for the expression of a functional channel), action potential generation.                                                                                                                                                                                               | 4; 6    | AD    | * 182389 |
| <b><i>SCN2A</i></b>   | Voltage-gated sodium channel alpha subunit 2 | 2q24.3          | Action potential initiation and conduction, neuronal plasticity, especially during CNS development.                                                                                                                                                                                                                            | 4; 6    | AD    | * 182390 |

|               |                                              |               |                                                                                                                                                                                                                                                                                                                                             |      |       |          |
|---------------|----------------------------------------------|---------------|---------------------------------------------------------------------------------------------------------------------------------------------------------------------------------------------------------------------------------------------------------------------------------------------------------------------------------------------|------|-------|----------|
| <b>SCN3A</b>  | Sodium voltage-gated channel alpha subunit 3 | 2q24.3        | Subunit of voltage-sensitive sodium channel involved in action potential generation.                                                                                                                                                                                                                                                        | 4; 6 | AD    | * 182391 |
| <b>SCN8A</b>  | Sodium voltage-gated channel alpha subunit 8 | 12q13.13      | Voltage-dependent sodium channel involved in action potential generation and synaptic plasticity.                                                                                                                                                                                                                                           | 4; 6 | AD    | * 182389 |
| <b>SCN9A</b>  | Sodium voltage-gated channel alpha subunit 9 | 2q24.3        | Voltage-gated sodium channel enriched in nociceptive and sympathetic neurons of the peripheral nervous system and in subcortical structures. Association with primary erythralgia (OMIM # 133020), congenital insensitivity to pain (OMIM # 243000), seizures and Dravet syndrome (OMIM # 607208).                                          | 4; 6 | AD/AR | * 603415 |
| <b>SETBP1</b> | SET-binding protein 1                        | 12q12.3       | Promotion of the oncoprotein SEB (involved in cell apoptosis, cell cycle regulation, negative regulation of neuronal differentiation). Association with Schinzel-Giedion midface retraction syndrome (OMIM # 269150).                                                                                                                       | 1; 6 | AD    | * 611060 |
| <b>SETD1B</b> | SET domain-containing protein 1B             | 12q24.31      | Domain of a histone methyltransferase complex involved in H3K4 methylation and epigenetic regulation of transcription.                                                                                                                                                                                                                      | 7    | AD    | * 611055 |
| <b>SETD5</b>  | SET domain containing 5                      | 3p25.3        | Putative methyltransferase mainly expressed in brain and spinal cord                                                                                                                                                                                                                                                                        | 7    | AD    | * 615743 |
| <b>SHANK2</b> | SH3 and multiple ankyrin repeat domains 2    | 11q13.3-q13.4 | Neuronal development through binding to SH3 domain of contactin, cytoskeletal reorganization during neurite outgrowth, synaptic scaffolding.                                                                                                                                                                                                | 2; 6 | AD    | * 603290 |
| <b>SHANK3</b> | SH3 and multiple ankyrin repeat domains      | 22q13.33      | Enriched at excitatory synapses. Role in receptor tyrosine kinase signaling, integration of neurotransmitter receptors into the cortical cytoskeleton at postsynaptic densities. Interaction with hyperpolarization-activated cyclic nucleotide-gated cation channel. Role in tubulogenesis, neuronal morphology and synaptic connectivity. | 6; 8 | AD    | * 606230 |
| <b>SHH</b>    | Sonic hedgehog                               | 7q36.3        | Notochord patterning, regulation of polarity and morphology during embryogenesis, regulation of primitive hematopoietic cells via mechanisms dependent on downstream bone morphogenic protein signals.                                                                                                                                      | 2    | AD    | * 600725 |

|                       |                                                                                                 |          |                                                                                                                                                                                                                                                                                                                                                                                  |      |     |          |
|-----------------------|-------------------------------------------------------------------------------------------------|----------|----------------------------------------------------------------------------------------------------------------------------------------------------------------------------------------------------------------------------------------------------------------------------------------------------------------------------------------------------------------------------------|------|-----|----------|
| <b><i>SHROOM4</i></b> | SHROOM Family member 4                                                                          | Xp11.2   | Role in neurulation, actin remodeling, ion channel function, and cytoskeletal architecture by modulating the spatial distribution of myosin II. Association with Stocco dos Santos X-linked mental retardation syndrome (OMIM # 300434).                                                                                                                                         | 2    | XL  | * 300579 |
| <b><i>SIN3A</i></b>   | SIN3 transcription regulator family member A                                                    | 15q24.2  | Scaffold protein for the assembly of a histone deacetylase corepressor complex together with HDACs                                                                                                                                                                                                                                                                               | 7    | AD  | * 607776 |
| <b><i>SIN3B</i></b>   | SIN3 transcription regulator family member 3B                                                   | 19p13.11 | Transcriptional repressor                                                                                                                                                                                                                                                                                                                                                        | 7    | AD  | * 607777 |
| <b><i>SLC16A2</i></b> | Solute carrier family 16 (monocarboxylic acid transporter) member 2                             | Xq13.2   | Transport of thyroid hormones or their inactive metabolites into and out of the cerebrospinal fluid. Association with Allan-Herndon-Dudley syndrome (OMIM # 300523).                                                                                                                                                                                                             | 5    | XL  | * 300095 |
| <b><i>SLC2A1</i></b>  | Solute carrier family 2, member 1                                                               | 1p34.2   | Transport of glucose and dehydroascorbic acid (vitamin C). Key glucose transporter at the blood brain barrier.                                                                                                                                                                                                                                                                   | 5    | AD  | * 138140 |
| <b><i>SLC6A8</i></b>  | Solute carrier family 6 (neurotransmitter transporter, creatine), member 8                      | Xq28     | Temporal and spatial maintenance of the energy supply to skeletal and cardiac muscle functioning as a sodium-dependent creatine transporter                                                                                                                                                                                                                                      | 5    | XLR | * 300036 |
| <b><i>SLC9A6</i></b>  | Solute carrier family 9, member A6                                                              | Xq26.3   | Monovalent sodium-selective sodium/hydrogen exchanger (NHE) found in the membranes of intracellular organelles such as mitochondria and endosomes. Control of intracellular pH, maintenance of cellular volume, and reabsorption of sodium across renal, intestinal, and other epithelia. Most abundant in mitochondrion-rich tissues such as brain, skeletal muscle, and heart. | 4    | XL  | * 300231 |
| <b><i>SMARCC2</i></b> | SWI/SNF related, matrix associated, actin dependent regulator of chromatin subfamily c member 2 | 12q13.2  | Repression of neurogenesis and control of cortical size through chromatin remodeling in a specific time window.                                                                                                                                                                                                                                                                  | 7    | AD  | * 611055 |
| <b><i>SMC1A</i></b>   | Structural maintenance of chromosomes 1A                                                        | Xp11.22  | Chromosome cohesion, condensation and recombination, generation of cell type-specific DNA loops linked to the gene expression program of each cell. Possible role in forebrain patterning. Association with Cornelia de Lange syndrome (OMIM # 300590).                                                                                                                          | 3; 7 | XLD | * 300040 |

|                |                                                         |                |                                                                                                                                                                                                                                                             |         |         |          |
|----------------|---------------------------------------------------------|----------------|-------------------------------------------------------------------------------------------------------------------------------------------------------------------------------------------------------------------------------------------------------------|---------|---------|----------|
| <b>SMC3</b>    | Structural maintenance of chromosomes 3                 | 10q25.2        | Subunit of the cohesin complex involved in sister chromatid cohesion, DNA repair mechanisms and maintenance of genome stability.                                                                                                                            | 3       | AD      | * 606062 |
| <b>SMS</b>     | Spermine synthase                                       | Xp22.1         | Synthesis of polyamines from arginine and methionine. Association with X-lined Snyder-Robinson type mental retardation (OMIM # 309583)                                                                                                                      | 5       | XLR     | * 300105 |
| <b>SOX2</b>    | SRY-box 2                                               | 3q26.33        | Transcriptional regulation by binding to DNA and causing its bending, inhibition of neuronal differentiation. Association with syndromic microphtalmia and optic nerve hypoplasia (OMIM # 206900).                                                          | 6; 7    | AD      | * 184429 |
| <b>SPTANI</b>  | Spectrin, alpha, non-erythrocytic 1                     | 9q34.11        | Filamentous cytoskeletal protein, heterodimer of a constant alpha-chain and variable, tissue-specific beta-chains. Regulation of receptor binding, cell cycle (inhibition of cell proliferation), actin crosslinking. Association with West syndrome.       | 1; 2    | AD      | * 182810 |
| <b>STAG1</b>   | Stromal antigen 1                                       | 3q22.3         | Subunit of the cohesin complex involved in the control of chromosome segregation during cell division, gene transcription, DNA repair and replication.                                                                                                      | 1; 3; 7 | AD      | * 604358 |
| <b>STXBPI</b>  | Syntaxin-binding protein 1                              | 9q34.11        | Regulation of synaptic vesicle docking and fusion. Association with epileptic encephalopathy (OMIM # 612164).                                                                                                                                               | 6; 9    | AD      | * 602926 |
| <b>SUPT16H</b> | SPT16 homolog, facilitates chromatin remodeling subunit | 14q11.2        | Component of the FACT (facilitates chromatin transcription) complex. Role in transcription elongation, DNA replication and repair.                                                                                                                          | 1; 3; 7 | AD      | * 605012 |
| <b>SYNI</b>    | Synapsin I                                              | Xp11.3-p11.2   | Neuronal phosphoprotein associated with the membranes of small synaptic vesicles, role in synaptic neurotransmission, neuronal development, synaptogenesis, maintenance of mature synapses, and plasticity.                                                 | 6       | XLD/XLR | * 313440 |
| <b>SYNGAP1</b> | Synaptic RAS-GTPase-activating protein 1                | 6p21.32        | Brain-specific synaptic Ras GTP-ase activating protein localized to dendritic spines in neocortical pyramidal neurons, role in suppression of signaling pathways linked to NMDA receptor-mediated synaptic plasticity and AMPA receptor membrane insertion. | 6; 8    | AD      | * 603384 |
| <b>SYP</b>     | Synaptophysin                                           | Xp11.23-p11.22 | The most abundant synaptic vesicle integral membrane protein by mass (10% of the total). Role in regulation of synaptic vesicle endocytosis.                                                                                                                | 6; 9    | XLR     | * 313475 |

|                       |                                                                    |          |                                                                                                                                                                                                                                                                                                                                                            |      |       |          |
|-----------------------|--------------------------------------------------------------------|----------|------------------------------------------------------------------------------------------------------------------------------------------------------------------------------------------------------------------------------------------------------------------------------------------------------------------------------------------------------------|------|-------|----------|
| <b><i>SZT2</i></b>    | Subunit of KICSTOR complex                                         | 1p34.2   | Protein with a superoxide dismutase motif and a peroxisomal targeting signal, mainly expressed in brain and spinal cord. Scaffold molecule forming the SZT2-GATOR1-GATOR2 complex for GATOR-dependent nutrient sensing and control of MTORC1 signaling.                                                                                                    | 5; 8 | AR    | * 615463 |
| <b><i>TAF1</i></b>    | TAF1 RNA polymerase II; TATA box-binding protein-associated factor | Xq13     | Binding protein complex required for RNA polymerase II-mediated transcription of many genes. Association with X-linked dystonia-parkinsonism (OMIM # 314250).                                                                                                                                                                                              | 7    | XLR   | * 313650 |
| <b><i>TAF2</i></b>    | TATA-box binding protein-associated factor 2                       | 8q24.12  | General transcription factor for RNA polymerases.                                                                                                                                                                                                                                                                                                          | 7    | AR    | * 604912 |
| <b><i>TBC1D24</i></b> | TBC1 domain family member 24                                       | 16p13.3  | Member of the Tre2-Bub2-Cdc16 (TBC) domain-containing RAB-specific GTPase-activating proteins. Coordination of Rab proteins and other GTPases for the proper transport of intracellular vesicles, promotion of neurite growth and arborization, brain development, vesicle trafficking at synapses. Specific function in the stereocilia of the inner ear. | 6; 9 | AD/AR | * 613577 |
| <b><i>TBLIXR1</i></b> | Transducin-beta-like 1 receptor 1                                  | 3q26.32  | Nuclear protein interacting with histones H2B and H4 with a role in transcription mediated by nuclear receptors. Association with Pierpoint syndrome (OMIM # 602342).                                                                                                                                                                                      | 7    | AD    | * 608628 |
| <b><i>TBX1</i></b>    | T-box region                                                       | 22q11.21 | Transcription factor, regulation of developmental processes. Association with DiGeorge syndrome (OMIM # 188400), velocardiofacial syndrome (OMIM #192430), conotruncal anomaly face syndrome (OMIM # 217095), and tetralogy of Fallot (OMIM # 187500).                                                                                                     | 7    | AD    | * 602054 |
| <b><i>TCF4</i></b>    | Transcription factor 4                                             | 18q21.2  | Transcription factor.                                                                                                                                                                                                                                                                                                                                      | 7    | AD    | * 602272 |
| <b><i>TECR</i></b>    | Trans-2,3-enoyl-CoA reductase                                      | 19p13.12 | Role in the final step of microsomal long and very long fatty acid elongation.                                                                                                                                                                                                                                                                             | 5    | AR    | * 610057 |
| <b><i>TMEM5</i></b>   | Transmembrane protein 5                                            | 12q14.2  | Glycosyltransferase involved in dystroglycan glycosylation                                                                                                                                                                                                                                                                                                 | 5    | AR    | * 605862 |
| <b><i>TPO</i></b>     | Thyroid peroxidase                                                 | 2p25.3   | Heme-containing protein located on the apical membranes of the thyroid follicular cell. Key role in thyroid hormone synthesis. Association with thyroid dyshormonogenesis-2A (OMIM # 274500).                                                                                                                                                              | 5    | AR    | * 606765 |

|                |                                               |          |                                                                                                                                                                                                                                                                                                                                                                        |      |     |          |
|----------------|-----------------------------------------------|----------|------------------------------------------------------------------------------------------------------------------------------------------------------------------------------------------------------------------------------------------------------------------------------------------------------------------------------------------------------------------------|------|-----|----------|
| <b>TRAPPC9</b> | Trafficking proteinparticle complex subunit 9 | 8q24.3   | Enhancer of neuronal NF- $\kappa$ -B signaling pathway through binding to NIK and IKK- $\beta$ , downstream component of NGF in neuronal cells.                                                                                                                                                                                                                        | 8    | AR  | * 611966 |
| <b>TRIO</b>    | Triple functional domain                      | 5p15.2   | Serine/threonine kinase guanine nucleotide exchange factor (GEF) for the family of Rho-like GTPases. Role in controlling cell proliferation.                                                                                                                                                                                                                           | 1; 8 | AD  | * 601893 |
| <b>TRIP12</b>  | Thyroid hormone receptor interactor 12        | 2q36.3   | Thyroid hormone receptor-interacting protein and HECT-type E3 ubiquitin-protein ligase, ubiquitination and protein labeling for proteasomal degradation, ubiquitin fusion degradation pathway, regulation of DNA damage-induced chromatin ubiquitination.                                                                                                              | 3; 8 | AD  | * 604506 |
| <b>TSC2</b>    | Tuberous sclerosis 2                          | 16p13.13 | Tumor suppressor by negatively regulating mTORC1 signaling. Role in microtubule-mediated protein transport and regulation of cellular energy response.                                                                                                                                                                                                                 | 5; 8 | AD  | * 191092 |
| <b>TSPAN7</b>  | Tetraspanin 7                                 | Xp11.4   | Contribution in molecular complexes including beta-1 integrins. Possible role in the control of neurite outgrowth.                                                                                                                                                                                                                                                     | 2; 6 | XLR | * 300096 |
| <b>TUSC3</b>   | Tumor suppressor candidate 3                  | 8p22     | Plasma membrane magnesium transport system. Role in embryonic development.                                                                                                                                                                                                                                                                                             | 4    | AR  | * 601385 |
| <b>UBE2A</b>   | Ubiquitin-conjugating enzyme E2A              | Xq24     | E2 ubiquitin-conjugating enzyme involved in the ubiquitin proteasome pathway of protein degradation. Role in DNA repair, fertility, and memory formation. Association with Nascimento-type X-linked syndromic mental retardation (OMIM # 300860).                                                                                                                      | 3; 8 | XLR | * 312180 |
| <b>UBE3A</b>   | Ubiquitin-protein ligase E3A                  | 15q11.2  | E3 ligase in the ubiquitin-proteasome pathway to degrade misfolded proteins. Role in transcriptional transactivation, dendritic patterning, synapse formation and organization, suppression of neuronal excitability via ubiquitin-mediated degradation of calcium- and voltage-gated big potassium channels (BK). Association with Angelman syndrome (OMIM # 105830). | 6; 7 | AD  | * 601623 |
| <b>UBE3B</b>   | Ubiquitin-protein ligase E3B                  | 12q24.11 | E3 ligase in the ubiquitin-proteasome pathway.                                                                                                                                                                                                                                                                                                                         | 8    | AR  | * 608047 |

|                      |                                                   |          |                                                                                                                                                                                                                                                                                                                                            |      |         |          |
|----------------------|---------------------------------------------------|----------|--------------------------------------------------------------------------------------------------------------------------------------------------------------------------------------------------------------------------------------------------------------------------------------------------------------------------------------------|------|---------|----------|
| <b><i>UPF3B</i></b>  | UPF3B regulator of nonsense-mediated mRNA decay   | Xq25-q26 | Regulation of translation through degradation of transcripts with premature termination codons.                                                                                                                                                                                                                                            | 7    | XLR     | * 300298 |
| <b><i>USP9X</i></b>  | Ubiquitin specific peptidase 9, X-linked          | Xp11.4   | Deubiquitination. Role in tissue-specific ciliary signal transduction pathways, neuronal growth and migration, regulation of dynamic protein-protein interaction and chromosome segregation independently of protein degradation.                                                                                                          | 6; 8 | XLD/XLR | * 300072 |
| <b><i>VLDLR</i></b>  | Very low density lipoprotein receptor             | 9p24.2   | Role in regulation of microtubule function in neurons and in neuronal migration during nervous system development. Association with cerebellar hypoplasia and mental retardation with or without quadrupedal locomotion 1 (OMIM # 224050).                                                                                                 | 2; 6 | AR      | * 192977 |
| <b><i>VPS13B</i></b> | Vacuolar protein sorting 13                       | 8q22.2   | Transmembrane protein involved in Golgi complex scaffolding and trafficking, vesicle-mediated transport and sorting of proteins within the cell and in the development and function of the eye, hematological system, and CNS (neurite outgrowth). Association with Cohen syndrome (OMIM # 216550).                                        | 2; 9 | AR      | * 607817 |
| <b><i>ZBTB18</i></b> | Zinc finger- and BTB domain-containing protein 18 | 1q44     | Chromatin assembly and transcriptional repression of key proneurogenic genes.                                                                                                                                                                                                                                                              | 6; 7 | AD      | * 608433 |
| <b><i>ZBTB20</i></b> | Zinc finger- and BTB domain-containing protein 20 | 3q13.31  | Member of the POK (POZ and Kruppel) family of transcriptional repressors. Expression detected in early hippocampal neurons, cerebellar granule cells, and gliogenic progenitors, as well as in differentiated glia. Possible role in hematopoiesis, oncogenesis, and immune responses. Association with Primrose syndrome (OMIM # 259050). | 6; 7 | AD      | * 606025 |
| <b><i>ZDHC9</i></b>  | Zinc finger DHCC domain-containing protein 9      | Xq26.1   | Protein acyltransferase activity on HRAS and NRAS. Association with Raymond type X-linked syndromic mental retardation (OMIM # 300799).                                                                                                                                                                                                    | 8    | XL      | * 300646 |
| <b><i>ZEB2</i></b>   | Zinc finger E box-binding homeobox 2              | 2q22.3   | DNA-binding transcriptional repressor interacting with activated SMADs, the transducers of TGF-beta signaling, and with the nucleosome remodeling and histone deacetylation (NURD) complex. Association with Mowat-Wilson syndrome (OMIM # 235730).                                                                                        | 7    | AD      | * 605802 |
| <b><i>ZMYM2</i></b>  | Zinc finger MYM-type- containing 2                | 13q12.11 | Transcriptional regulation.                                                                                                                                                                                                                                                                                                                | 7    | AD      | * 602221 |

|               |                         |              |                                                                                                                                              |      |    |          |
|---------------|-------------------------|--------------|----------------------------------------------------------------------------------------------------------------------------------------------|------|----|----------|
| <i>ZNF41</i>  | Zinc finger protein 41  | Xp11.3       | Transcriptional repression, chromatin remodeling.                                                                                            | 7    | XL | * 314995 |
| <i>ZNF674</i> | Zinc finger protein 674 | Xp11         | Regulation of transcription by forming a nuclear receptor corepressor complex. Crucial role in human cognitive functioning.                  | 6; 7 | XL | * 300573 |
| <i>ZNF711</i> | Zinc finger protein 711 | Xq21.1-q21.3 | Transcriptional regulation in brain development through binding to the promoter of target genes and recruitment of PHF8 histone demethylase. | 7    | XL | * 314990 |
| <i>ZNF81</i>  | Zinc finger protein 81  | Xp11.23      | Krüppel-type zinc finger gene (with a Krüppel repressor domain). RNA polymerase II-specific transcription factor. Role in gene silencing.    | 7    | XL | * 314998 |

\*1. Cell cycle regulation; 2. Cell structure and polarity; 3. Genomic stability/DNA repair; 4. Membrane polarity/electrochemical gradient; 5. Metabolic pathways; 6. Brain function/development and neuronal signaling; 7. Transcriptional/translational regulation and cell differentiation; 8. Intra- and intercellular signal transduction; 9. Vesicular trafficking.

**Abbreviations:** AD, autosomal dominant; AR, autosomal recessive; N.A., not applicable; XL, X-linked; XLD, X-linked dominant; XLR, X-linked recessive.
