# Supplementary material for: The Usefulness of a Targeted Next Generation Sequencing Gene Panel in Providing Molecular Diagnosis to Patients With a Broad Spectrum of Neurodevelopmental Disorders
Source: PubMed Central journal article supplement (PMC9403311; doi:10.3389/fgene.2022.875182), 2022-08-11
Supplement: Table2.pdf [file Table2.pdf]

Supplementary Table 2 **Causative variants detected in the 71 patients.**

| Patient code | Sex | Gene           | Variant                                             | Mode of inheritance | Variant segregation | Variant Classification | ID | ASD | Epilepsy | Phenotype correlation |
|--------------|-----|----------------|-----------------------------------------------------|---------------------|---------------------|------------------------|----|-----|----------|-----------------------|
| 9916         | M   | <i>AKT3</i>    | NM_005465.7:c.503A>G<br>p.Lys168Arg                 | AD                  | Mat                 | P                      | x  | -   | -        | Yes                   |
| 8513         | F   | <i>ANKRD11</i> | NM_013275.6:c.2408-2412del<br>p.Lys803ArgfsTer5     | AD                  | <i>de novo</i>      | P                      | x  | -   | -        | Yes                   |
| 10231        | F   | <i>ANKRD11</i> | NM_013275.6:c.1903_1907del<br>p.Lys635GlnfsTer26    | AD                  | Mat                 | P                      | x  | -   | x        | Yes                   |
| 10462        | M   | <i>ANKRD11</i> | NM_013275.6:c.4384dupA<br>p.Arg1462LysfsTer92       | AD                  | <i>de novo</i>      | P                      | x  | -   | x        | Yes                   |
| 88-19        | F   | <i>ARID1B</i>  | NM_017519.3:c.5003_5004insC<br>p.Gln1668HisfsTer38  | AD                  | <i>de novo</i>      | P                      | -  | -   | x        | Yes                   |
| 212-20       | M   | <i>ARID1B</i>  | NM_017519.3:c.4258_4259insC<br>p.Gly1420AlafsTer109 | AD                  | <i>de novo</i>      | P                      | -  | -   | x        | Yes                   |
| 482-19       | M   | <i>ATPIA2</i>  | NM_000702.4:c.1091C>T<br>p.Thr364Met                | AD                  | Mat                 | P                      | -  | -   | x        | Yes                   |
| 78-20        | F   | <i>ATPIA2</i>  | NM_000702.4:c.2750C>T<br>p.Thr917Met                | AD                  | <i>de novo</i>      | P                      | -  | -   | x        | Yes                   |
| 514-21       | F   | <i>ATPIA2</i>  | NM_000702.4:c.904del<br>p.Val302SerfsTer25          | AD                  | nd                  | P                      | x  | -   | -        | Yes                   |

|               |   |                |                                                    |          |                |    |   |   |   |         |
|---------------|---|----------------|----------------------------------------------------|----------|----------------|----|---|---|---|---------|
| <b>10727</b>  | M | <b>CACNA1A</b> | NM_000068.4: c.1067T>C<br>p.Leu356Pro              | AD       | <i>de novo</i> | P  | x | - | - | Yes     |
| <b>927-19</b> | F | <b>CACNA1A</b> | NM_000068.4: c.5005C>T<br>p.Arg1669Ter             | AD       | <i>de novo</i> | P  | x | - | x | Yes     |
| <b>8804</b>   | M | <b>CACNA1A</b> | NM_000068.4: c.3958G>A<br>p.Asp1320Asn             | AD       | <i>de novo</i> | P  | x | - | x | Yes     |
| <b>928-19</b> | F | <b>CASK</b>    | NM_003688.3:c.252_255del<br>p.Asp84GlufsTer20      | X-linked | <i>de novo</i> | P  | x | - | x | Yes     |
| <b>10635</b>  | F | <b>CASK</b>    | NM_003688.3:c.1090A>G<br>p.Ser364Gly               | X-linked | nd             | LP | x | - | - | Yes     |
| <b>10851</b>  | M | <b>CDKL5</b>   | NM_003159.2:c.2798-1G>A                            | X-linked | Mat            | P  | - | x | - | Yes     |
| <b>513-20</b> | F | <b>CDKL5</b>   | NM_003159.2:c.484G>T<br>p.Glu162Ter                | X-linked | <i>de novo</i> | P  | x | x | x | Yes     |
| <b>8325</b>   | F | <b>CHD7</b>    | NM_017780.4:c.5665+1G>C                            | AD       | nd             | P  | x | - | - | Yes     |
| <b>10458</b>  | M | <b>CREBBP</b>  | NM_004380.3: c.3832G>A<br>p.Glu1278Lys             | AD       | <i>de novo</i> | P  | x | - | - | Yes     |
| <b>948-19</b> | M | <b>CTNNB1</b>  | NM_001904.4:c.936_936+1insTG<br>p.Leu313CysfsTer13 | AD       | <i>de novo</i> | P  | x | - | - | Yes     |
| <b>8511</b>   | M | <b>CTNND2</b>  | NM_001332.4: c.313C>T<br>p.Gln105Ter               | AD       | Mat            | P  | - | - | - | Partial |

|               |   |                |                                               |          |                |   |   |   |   |         |
|---------------|---|----------------|-----------------------------------------------|----------|----------------|---|---|---|---|---------|
| <b>9481</b>   | F | <b>DDX3X</b>   | NM_001356.5:c.1171-1G>T                       | X-linked | <i>de novo</i> | P | x | - | - | Yes     |
| <b>8836</b>   | M | <b>DHCR7</b>   | NM_001360.3:c.964-1G>C                        | AR       | Mat            | P | x | - | - | Yes     |
|               |   |                | NM_001360.3:c.523G>A<br>p.Asp175Asn           | AR       | Pat            | P |   |   |   |         |
| <b>765-20</b> | M | <b>EHMT1</b>   | NM_024757.5:c.523C>G<br>p.Thr1133Arg          | AD       | <i>de novo</i> | P | x | x | - | Yes     |
| <b>345-19</b> | F | <b>FOXG1</b>   | NM_005249.5: c.694A>G<br>p.Asn232Asp          | AD       | <i>de novo</i> | P | x | - | x | Yes     |
| <b>213-20</b> | M | <b>FOXPI</b>   | NM_032682.6:c.570-1G>C                        | AD       | <i>de novo</i> | P | x | - | x | Yes     |
| <b>749-20</b> | F | <b>FOXPI</b>   | NM_032682.6:c.1240dup<br>p.Leu414ProfsTer47   | AD       | <i>de novo</i> | P | x | - | - | Yes     |
| <b>574-19</b> | F | <b>FOXPI</b>   | NM_032682.6:c.777_780del<br>p.Lys259AsnfsTer6 | AD       | <i>de novo</i> | P | x | x | x | Yes     |
| <b>684-19</b> | F | <b>GABRA1</b>  | NM_000806.5:c.641G>A<br>p.Arg214His           | AD       | <i>de novo</i> | P | - | - | x | Yes     |
| <b>9226</b>   | F | <b>GATAD2B</b> | NM_020699.4:c.332G>A<br>p.Arg111Gln           | AD       | <i>de novo</i> | P | x | - | - | Yes     |
| <b>490-19</b> | F | <b>GDI1</b>    | NM_001493.3:c.1036C>T<br>p.Gln346Ter          | X-linked | Pat            | P | x | - | - | Partial |

|                |   |               |                                                |          |                |    |   |   |   |         |
|----------------|---|---------------|------------------------------------------------|----------|----------------|----|---|---|---|---------|
| <b>2-20</b>    | M | <b>GNAS</b>   | NM_080425.3:c.303_304insT<br>p.Met102TyrfsTer6 | AD       | nd             | P  | x | - | - | Yes     |
| <b>446-20</b>  | F | <b>GNAS</b>   | NM_080425.3:c.214G>A<br>p.Gly716Ser            | AD       | nd             | LP | - | x | - | Yes     |
| <b>796-19</b>  | F | <b>GNAS</b>   | NM_080425.3:c.2936G>A<br>p.Arg979Gln           | AD       | Mat            | P  | x | - | - | Yes     |
| <b>328-19</b>  | M | <b>GRIN2B</b> | NM_000834.5: c.1385T>C<br>p.Ile462Thr          | AD       | <i>de novo</i> | P  | x | - | x | Yes     |
| <b>422-20</b>  | F | <b>GRIN2B</b> | NM_000834.5:c.286G>A<br>p.Gly96Arg             | AD       | <i>de novo</i> | P  | x | - | - | Yes     |
| <b>947-19</b>  | M | <b>KANSLI</b> | NM_001193466.2:c.1653-2A>G                     | AD       | nd             | P  | - | - | - | Yes     |
| <b>275-19</b>  | M | <b>KANSLI</b> | NM_001193466.2:c.2021A>G<br>p.Asp674Gly        | AD       | Mat            | P  | - | x | - | Partial |
| <b>8579</b>    | M | <b>KCNQ2</b>  | NM_172107.4:c.1090G>C<br>p.Glu364Gln           | AD       | Pat            | LP | x | - | x | Yes     |
| <b>525-21</b>  | M | <b>KCNQ2</b>  | NM_172107.4:c.641G>A<br>p.Arg214Gln            | AD       | <i>de novo</i> | P  | - | - | x | Yes     |
| <b>10617</b>   | M | <b>KDM5B</b>  | NM_006618.5:c.3133C>T<br>p.Arg1045Ter          | AD       | Pat            | P  | x | - | - | Yes     |
| <b>1002-19</b> | M | <b>KDM6A</b>  | NM_021140.3:c.1952C>A<br>p.Ser651Ter           | X-linked | Mat            | P  | x | - | - | Yes     |

|               |   |               |                                              |          |                |    |   |   |   |         |
|---------------|---|---------------|----------------------------------------------|----------|----------------|----|---|---|---|---------|
| <b>32-19</b>  | F | <b>MECP2</b>  | NM_004992.4:c.397C>T<br>p.Arg133Cys          | X-linked | <i>de novo</i> | P  | x | - | x | Yes     |
| <b>257-19</b> | F | <b>MED13L</b> | NM_015335.4:c.4963delG<br>p.Glu1655LysfsTer5 | AD       | <i>de novo</i> | P  | x | - | - | Yes     |
| <b>7790</b>   | F | <b>NAA10</b>  | NM_003491.4:c.384T>A<br>p.Phe128Leu          | X-linked | <i>de novo</i> | P  | x | - | x | Yes     |
| <b>254-19</b> | F | <b>NALCN</b>  | NM_052867.4:c.2294G>C<br>p.Arg765Thr         | AD       | Pat            | LP | - | - | x | Yes     |
| <b>139-20</b> | F | <b>NEXMIF</b> | NM_001008537.3:c.2552C>A<br>p.Ser851Ter      | X-linked | <i>de novo</i> | P  | x | - | x | Yes     |
| <b>9322</b>   | M | <b>NLGN1</b>  | NM_014932.5:c.1156G>T<br>p.Gly386Ter         | AD       | Pat            | P  | x | - | - | Partial |
| <b>494-19</b> | F | <b>PAK3</b>   | NM_001128168.3: c.500C>G<br>p.Thr167Arg      | X-linked | Mat            | LP | - | - | x | Yes     |
| <b>781-20</b> | F | <b>PHIP</b>   | NM_017934.7:c.1096G>T<br>p.Asp366Tyr         | AD       | <i>de novo</i> | P  | x | - | - | Yes     |
| <b>85-19</b>  | F | <b>PRRT2</b>  | NM_145239.3:c.649dupC<br>p.Arg217ProfsTer8   | AD       | Mat            | P  | - | - | x | Yes     |
| <b>9574</b>   | M | <b>RAI1</b>   | NM_030665.4:c.2000T>C<br>p.Leu667Pro         | AD       | <i>de novo</i> | LP | x | - | - | Yes     |
| <b>10488</b>  | F | <b>SCN1A</b>  | NM_001165963.4:c.2266A>T<br>p.Lys756Ter      | AD       | nd             | P  | - | - | x | Yes     |

|               |   |               |                                                      |    |                |    |   |   |   |         |
|---------------|---|---------------|------------------------------------------------------|----|----------------|----|---|---|---|---------|
| <b>10457</b>  | F | <b>SCN1A</b>  | NM_001165963.4: c.695-6_695-3del                     | AD | <i>de novo</i> | P  | x | - | x | Yes     |
| <b>11-19</b>  | F | <b>SCN1A</b>  | NM_001165963.4: c.4793A>T<br>p.Tyr1598Phe            | AD | Mat            | LP | - | x | - | Partial |
| <b>88-20</b>  | F | <b>SCN1A</b>  | NM_006920.6:c.5104G>T<br>p.Asp1702Tyr                | AD | <i>de novo</i> | P  | - | x | - | Partial |
| <b>10463</b>  | F | <b>SCN8A</b>  | NM_014191: c.4594A>T<br>p.Ile1532Phe                 | AD | <i>de novo</i> | P  | x | - | x | Yes     |
| <b>81-19</b>  | M | <b>SETD1B</b> | NM_001353345.2:c.5291_5292insA<br>p.Asn1765GlnfsTer9 | AD | <i>de novo</i> | P  | x | - | x | Yes     |
| <b>9137</b>   | M | <b>SHANK2</b> | NM_133266.5:c.769C>T<br>p.Arg257Ter                  | AD | <i>de novo</i> | P  | x | - | - | Yes     |
| <b>9320</b>   | F | <b>SLC2A1</b> | NM_006516.4:c.388G>A<br>p.Gly130Ser                  | AD | Mat            | P  | - | - | x | Yes     |
| <b>483-19</b> | M | <b>SLC2A1</b> | NM_006516.4:c.988C>T<br>p.Arg330Ter                  | AD | <i>de novo</i> | P  | x | - | x | Yes     |
| <b>8697</b>   | M | <b>SLC2A1</b> | NM_006516.4:c.85_89del<br>p.Asn29TrpfsTer58          | AD | nd             | P  | - | - | x | Yes     |
| <b>10360</b>  | F | <b>SLC2A1</b> | NM_006516.4: c.967G>A<br>p.Val323Met                 | AD | Mat            | LP | - | - | x | Yes     |
| <b>12-21</b>  | F | <b>SLC2A1</b> | NM_006516.4:c.109C>T<br>p.Gln37Ter                   | AD | nd             | P  | - | - | x | Yes     |

|               |   |                |                                                  |          |                |    |   |   |   |     |
|---------------|---|----------------|--------------------------------------------------|----------|----------------|----|---|---|---|-----|
| <b>1-19</b>   | F | <b>SLC9A6</b>  | NM_001042537.1:c.264C>G<br>p.Ile88Met            | X-linked | <i>de novo</i> | LP | x | x | - | Yes |
| <b>84-19</b>  | F | <b>SMARCC2</b> | NM_003075.5:c.2984dupC<br>p.Ala996CysfsTer16     | AD       | nd             | P  | x | - | x | Yes |
| <b>896-19</b> | F | <b>SYNGAP1</b> | NM_006772.3:c.509G>A<br>p.Arg170Gln              | AD       | <i>de novo</i> | P  | - | x | x | Yes |
| <b>559-19</b> | M | <b>TPO</b>     | NM_000547.5:c.1472G>A<br>p.Arg491His             | AR       | Mat/Pat        | P  | x | - | - | Yes |
| <b>298-19</b> | M | <b>TBX1</b>    | NM_080646.1:c.1010-2A>G                          | AD       | nd             | P  |   |   |   | Yes |
|               |   | <b>UBE3A</b>   | NM_000462.5: c.2576_2579del<br>p.Lys859ArgfsTer4 | AD       | nd             | P  | x | - | - | Yes |
| <b>10456</b>  | M | <b>VPS13B</b>  | NM_017890.4:c.9406-1G>T                          | AR       | Pat            | P  |   |   |   | Yes |
|               |   |                | del ex4-7                                        | AR       | Mat            | P  | x | - | - | Yes |
| <b>211-20</b> | M | <b>ZMYM2</b>   | NM_197968.4:c.1765C>T<br>p.Arg589Ter             | AD       | Pat            | P  | x | x | - | Yes |
| <b>8634</b>   | F | <b>ZMYM2</b>   | NM_197968.4:c.474dup<br>p.Ser159GlnfsTer6        | AD       | <i>de novo</i> | P  | x | - | - | Yes |

**Abbreviations:** AD, autosomal dominant; AR, autosomal recessive; ASD, autism spectrum disorder; F, female; ID, intellectual disability; LP, likely pathogenic; M, male; Mat, maternal; nd, not determined; P, pathogenic; Pat, paternal.
